# Supplementary material
Source: publisher site journal article supplement (https://www.dovepress.com/article/613776)
Supplement: Supplementary file 1 [file 613776%20Revised%20appendices_2.docx]

**Appendix 1 Search strategies**

| Database | Search History | Search Results | Search Date |
| --- | --- | --- | --- |
| PubMed | | | |
| 1 | "Neuralgia, Postherpetic"[Mesh] | 1,587 | 2025.10.20 |
| 2 | "Herpes Zoster"[Mesh] | 14,058 | 2025.10.20 |
| 3 | "Pain"[Mesh] | 494,568 | 2025.10.20 |
| 4 | "Neuralgia"[Mesh] | 27,195 | 2025.10.20 |
| 5 | "postherpetic neuralgia"[Title/Abstract] OR "herpetic neuralgia"[Title/Abstract] OR "postherpetic pain"[Title/Abstract] OR "PHN"[Title/Abstract] | 5,107 | 2025.10.20 |
| 6 | ("herpes zoster"[Title/Abstract] OR "Shingles"[Title/Abstract] OR "Zona"[Title/Abstract] OR "Zoster"[Title/Abstract] OR "VZV"[Title/Abstract]) | 38,860 | 2025.10.20 |
| 7 | "Pain"[Title/Abstract] OR "ache*"[Title/Abstract] | 926,092 | 2025.10.20 |
| 8 | "neuralgia*"[Title/Abstract] OR "neurological pain"[Title/Abstract] OR "neurologic pain"[Title/Abstract] OR "neuralgy"[Title/Abstract] OR "neuralgic pain"[Title/Abstract] OR "nerve pain"[Title/Abstract] OR "nerve pains"[Title/Abstract] OR "neuropathic pain"[Title/Abstract] OR "neuropathic pains"[Title/Abstract] OR "neurodynia*"[Title/Abstract] | 48,000 | 2025.10.20 |
| 9 | ("Neuralgia, Postherpetic"[Mesh]) OR ("postherpetic neuralgia"[Title/Abstract] OR "herpetic neuralgia"[Title/Abstract] OR "postherpetic pain"[Title/Abstract] OR "PHN"[Title/Abstract]) | 5,316 | 2025.10.20 |
| 10 | ("Herpes Zoster"[Mesh]) OR (("herpes zoster"[Title/Abstract] OR "Shingles"[Title/Abstract] OR "Zona"[Title/Abstract] OR "Zoster"[Title/Abstract] OR "VZV"[Title/Abstract])) | 41,465 | 2025.10.20 |
| 11 | ("Pain"[Mesh]) OR ("Pain"[Title/Abstract] OR "ache*"[Title/Abstract]) | 1,092,675 | 2025.10.20 |
| 12 | ("Neuralgia"[Mesh]) OR ("neuralgia*"[Title/Abstract] OR "neurological pain"[Title/Abstract] OR "neurologic pain"[Title/Abstract] OR "neuralgy"[Title/Abstract] OR "neuralgic pain"[Title/Abstract] OR "nerve pain"[Title/Abstract] OR "nerve pains"[Title/Abstract] OR "neuropathic pain"[Title/Abstract] OR "neuropathic pains"[Title/Abstract] OR "neurodynia*"[Title/Abstract]) | 57,338 | 2025.10.20 |
| 13 | (("Pain"[Mesh]) OR ("Pain"[Title/Abstract] OR "ache*"[Title/Abstract])) OR (("Neuralgia"[Mesh]) OR ("neuralgia*"[Title/Abstract] OR "neurological pain"[Title/Abstract] OR "neurologic pain"[Title/Abstract] OR "neuralgy"[Title/Abstract] OR "neuralgic pain"[Title/Abstract] OR "nerve pain"[Title/Abstract] OR "nerve pains"[Title/Abstract] OR "neuropathic pain"[Title/Abstract] OR "neuropathic pains"[Title/Abstract] OR "neurodynia*"[Title/Abstract])) | 1,099,049 | 2025.10.20 |
| 14 | (("Herpes Zoster"[Mesh]) OR (("herpes zoster"[Title/Abstract] OR "Shingles"[Title/Abstract] OR "Zona"[Title/Abstract] OR "Zoster"[Title/Abstract] OR "VZV"[Title/Abstract]))) AND ((("Pain"[Mesh]) OR ("Pain"[Title/Abstract] OR "ache*"[Title/Abstract])) OR (("Neuralgia"[Mesh]) OR ("neuralgia*"[Title/Abstract] OR "neurological pain"[Title/Abstract] OR "neurologic pain"[Title/Abstract] OR "neuralgy"[Title/Abstract] OR "neuralgic pain"[Title/Abstract] OR "nerve pain"[Title/Abstract] OR "nerve pains"[Title/Abstract] OR "neuropathic pain"[Title/Abstract] OR "neuropathic pains"[Title/Abstract] OR "neurodynia*"[Title/Abstract]))) | 4,792 | 2025.10.20 |
| 15 | (("Neuralgia, Postherpetic"[Mesh]) OR ("postherpetic neuralgia"[Title/Abstract] OR "herpetic neuralgia"[Title/Abstract] OR "postherpetic pain"[Title/Abstract] OR "PHN"[Title/Abstract])) OR ((("Herpes Zoster"[Mesh]) OR (("herpes zoster"[Title/Abstract] OR "Shingles"[Title/Abstract] OR "Zona"[Title/Abstract] OR "Zoster"[Title/Abstract] OR "VZV"[Title/Abstract]))) AND ((("Pain"[Mesh]) OR ("Pain"[Title/Abstract] OR "ache*"[Title/Abstract])) OR (("Neuralgia"[Mesh]) OR ("neuralgia*"[Title/Abstract] OR "neurological pain"[Title/Abstract] OR "neurologic pain"[Title/Abstract] OR "neuralgy"[Title/Abstract] OR "neuralgic pain"[Title/Abstract] OR "nerve pain"[Title/Abstract] OR "nerve pains"[Title/Abstract] OR "neuropathic pain"[Title/Abstract] OR "neuropathic pains"[Title/Abstract] OR "neurodynia*"[Title/Abstract])))) | 7,541 | 2025.10.20 |
| 16 | "Acupuncture"[Mesh] OR "Acupuncture Therapy"[Mesh] OR "Acupuncture Points"[Mesh] | 33,188 | 2025.10.20 |
| 17 | "Electroacupuncture"[Mesh] | 5,740 | 2025.10.20 |
| 18 | "Acupuncture, Ear"[Mesh] | 556 | 2025.10.20 |
| 19 | (Acupuncture Points[Title/Abstract] OR Acupuncture Therapy[Title/Abstract] OR Acupuncture[Title/Abstract] OR acupuncture point[Title/Abstract] OR acupoint*[Title/Abstract] OR needle*[Title/Abstract] OR needling[Title/Abstract] OR Electroacupuncture[Title/Abstract] OR electro-acupuncture[Title/Abstract] OR warm acupuncture[Title/Abstract] OR fire acupuncture[Title/Abstract] OR thermo-acupuncture[Title/Abstract] OR thermoacupuncture[Title/Abstract] OR Ear Acupunctures[Title/Abstract] OR Auricular Acupunctures[Title/Abstract] OR auricular acupuncture[Title/Abstract] OR auriculo-acupuncture[Title/Abstract] OR auriculoacupuncture[Title/Abstract] OR auriculotherapy[Title/Abstract] OR scalp acupuncture[Title/Abstract] OR Abdominal acupuncture[Title/Abstract] OR acupotomy[Title/Abstract] OR Acupotomies[Title/Abstract] OR needle-knife[Title/Abstract] OR Floating Needle[Title/Abstract] OR Plum Blossom Needle[Title/Abstract] OR catgut embedding[Title/Abstract] OR ACET[Title/Abstract] OR acupoint catgut embedding therapy[Title/Abstract] OR catgut implantation[Title/Abstract] OR Wrist-Ankle Acupuncture[Title/Abstract] OR press needling[Title/Abstract] OR intradermal acupuncture[Title/Abstract]) | 187,843 | 2025.10.20 |
| 20 | ((("Acupuncture"[Mesh] OR "Acupuncture Therapy"[Mesh] OR "Acupuncture Points"[Mesh]) OR ("Electroacupuncture"[Mesh])) OR ("Acupuncture, Ear"[Mesh])) OR ((Acupuncture Points[Title/Abstract] OR Acupuncture Therapy[Title/Abstract] OR Acupuncture[Title/Abstract] OR acupuncture point[Title/Abstract] OR acupoint*[Title/Abstract] OR needle*[Title/Abstract] OR needling[Title/Abstract] OR Electroacupuncture[Title/Abstract] OR electro-acupuncture[Title/Abstract] OR warm acupuncture[Title/Abstract] OR fire acupuncture[Title/Abstract] OR thermo-acupuncture[Title/Abstract] OR thermoacupuncture[Title/Abstract] OR Ear Acupunctures[Title/Abstract] OR Auricular Acupunctures[Title/Abstract] OR auricular acupuncture[Title/Abstract] OR auriculo-acupuncture[Title/Abstract] OR auriculoacupuncture[Title/Abstract] OR auriculotherapy[Title/Abstract] OR scalp acupuncture[Title/Abstract] OR Abdominal acupuncture[Title/Abstract] OR acupotomy[Title/Abstract] OR Acupotomies[Title/Abstract] OR needle-knife[Title/Abstract] OR Floating Needle[Title/Abstract] OR Plum Blossom Needle[Title/Abstract] OR catgut embedding[Title/Abstract] OR ACET[Title/Abstract] OR acupoint catgut embedding therapy[Title/Abstract] OR catgut implantation[Title/Abstract] OR Wrist-Ankle Acupuncture[Title/Abstract] OR press needling[Title/Abstract] OR intradermal acupuncture[Title/Abstract])) | 192,908 | 2025.10.20 |
| 21 | ((("Neuralgia, Postherpetic"[Mesh]) OR ("postherpetic neuralgia"[Title/Abstract] OR "herpetic neuralgia"[Title/Abstract] OR "postherpetic pain"[Title/Abstract] OR "PHN"[Title/Abstract])) OR ((("Herpes Zoster"[Mesh]) OR (("herpes zoster"[Title/Abstract] OR "Shingles"[Title/Abstract] OR "Zona"[Title/Abstract] OR "Zoster"[Title/Abstract] OR "VZV"[Title/Abstract]))) AND ((("Pain"[Mesh]) OR ("Pain"[Title/Abstract] OR "ache*"[Title/Abstract])) OR (("Neuralgia"[Mesh]) OR ("neuralgia*"[Title/Abstract] OR "neurological pain"[Title/Abstract] OR "neurologic pain"[Title/Abstract] OR "neuralgy"[Title/Abstract] OR "neuralgic pain"[Title/Abstract] OR "nerve pain"[Title/Abstract] OR "nerve pains"[Title/Abstract] OR "neuropathic pain"[Title/Abstract] OR "neuropathic pains"[Title/Abstract] OR "neurodynia*"[Title/Abstract]))))) AND (((("Acupuncture"[Mesh] OR "Acupuncture Therapy"[Mesh] OR "Acupuncture Points"[Mesh]) OR ("Electroacupuncture"[Mesh])) OR ("Acupuncture, Ear"[Mesh])) OR ((Acupuncture Points[Title/Abstract] OR Acupuncture Therapy[Title/Abstract] OR Acupuncture[Title/Abstract] OR acupuncture point[Title/Abstract] OR acupoint*[Title/Abstract] OR needle*[Title/Abstract] OR needling[Title/Abstract] OR Electroacupuncture[Title/Abstract] OR electro-acupuncture[Title/Abstract] OR warm acupuncture[Title/Abstract] OR fire acupuncture[Title/Abstract] OR thermo-acupuncture[Title/Abstract] OR thermoacupuncture[Title/Abstract] OR Ear Acupunctures[Title/Abstract] OR Auricular Acupunctures[Title/Abstract] OR auricular acupuncture[Title/Abstract] OR auriculo-acupuncture[Title/Abstract] OR auriculoacupuncture[Title/Abstract] OR auriculotherapy[Title/Abstract] OR scalp acupuncture[Title/Abstract] OR Abdominal acupuncture[Title/Abstract] OR acupotomy[Title/Abstract] OR Acupotomies[Title/Abstract] OR needle-knife[Title/Abstract] OR Floating Needle[Title/Abstract] OR Plum Blossom Needle[Title/Abstract] OR catgut embedding[Title/Abstract] OR ACET[Title/Abstract] OR acupoint catgut embedding therapy[Title/Abstract] OR catgut implantation[Title/Abstract] OR Wrist-Ankle Acupuncture[Title/Abstract] OR press needling[Title/Abstract] OR intradermal acupuncture[Title/Abstract]))) | 248 | 2025.10.20 |
| Embase | | | |
| 1 | 'postherpetic neuralgia'/exp OR 'postherpetic neuralgia':ti,ab,kw OR 'herpetic neuralgia':ti,ab,kw OR 'postherpetic pain':ti,ab,kw OR 'phn':ti,ab,kw | 10256 | 2025.10.20 |
| 2 | 'herpes zoster'/exp OR 'herpes zoster':ti,ab,kw OR 'shingles':ti,ab,kw OR 'zona':ti,ab,kw OR 'zoster':ti,ab,kw OR 'vzv':ti,ab,kw | 67614 | 2025.10.20 |
| 3 | 'pain'/exp OR 'pain':ti,ab,kw OR 'ache*':ti,ab,kw | 2434860 | 2025.10.20 |
| 4 | 'neuralgia'/exp OR 'neuralgia*':ti,ab,kw OR 'neurological pain':ti,ab,kw OR 'neurologic pain':ti,ab,kw OR 'neuralgy':ti,ab,kw OR 'neuralgic pain':ti,ab,kw OR 'nerve pain':ti,ab,kw OR 'nerve pains':ti,ab,kw OR 'neuropathic pain':ti,ab,kw OR 'neuropathic pains':ti,ab,kw OR 'neurodynia*':ti,ab,kw | 170008 | 2025.10.20 |
| 5 | #3 OR #4 | 2436235 | 2025.10.20 |
| 6 | #2 AND #5 | 15088 | 2025.10.20 |
| 7 | #1 OR #6 | 20837 | 2025.10.20 |
| 8 | 'catgut embedding'/exp OR 'acupotomy'/exp OR 'auricular acupuncture'/exp OR 'warm acupuncture'/exp OR 'electroacupuncture'/exp OR 'acupuncture point'/exp OR 'acupuncture'/exp OR 'acupuncture points':ti,ab,kw OR 'acupuncture therapy':ti,ab,kw OR 'acupuncture':ti,ab,kw OR 'acupuncture point':ti,ab,kw OR 'acupoint*':ti,ab,kw OR 'needle*':ti,ab,kw OR 'needling':ti,ab,kw OR 'electroacupuncture':ti,ab,kw OR 'electro-acupuncture':ti,ab,kw OR 'warm acupuncture':ti,ab,kw OR 'fire acupuncture':ti,ab,kw OR 'thermo-acupuncture':ti,ab,kw OR 'thermoacupuncture':ti,ab,kw OR 'ear acupunctures':ti,ab,kw OR 'auricular acupunctures':ti,ab,kw OR 'auricular acupuncture':ti,ab,kw OR 'auriculo-acupuncture':ti,ab,kw OR 'auriculoacupuncture':ti,ab,kw OR 'auriculotherapy':ti,ab,kw OR 'scalp acupuncture':ti,ab,kw OR 'abdominal acupuncture':ti,ab,kw OR 'acupotomy':ti,ab,kw OR 'acupotomies':ti,ab,kw OR 'needle-knife':ti,ab,kw OR 'floating needle':ti,ab,kw OR 'plum blossom needle':ti,ab,kw OR 'catgut embedding':ti,ab,kw OR 'acet':ti,ab,kw OR 'acupoint catgut embedding therapy':ti,ab,kw OR 'catgut implantation':ti,ab,kw OR 'wrist-ankle acupuncture':ti,ab,kw OR 'press needling':ti,ab,kw OR 'intradermal acupuncture':ti,ab,kw | 300663 | 2025.10.20 |
| 9 | #7 AND #8 | 658 | 2025.10.20 |
| Web of Science | | | |
|  | (TS=(("postherpetic neuralgia") OR ("herpetic neuralgia") OR ("postherpetic pain") OR ("PHN") OR ((("herpes zoster") OR ("Shingles") OR ("Zona") OR ("Zoster") OR ("VZV")) AND ((("Pain") OR ("ache*")) OR (("neuralgia*") OR ("neurological pain") OR ("neurologic pain") OR ("neuralgy") OR ("neuralgic pain") OR ("nerve pain") OR ("nerve pains") OR ("neuropathic pain") OR ("neuropathic pains") OR ("neurodynia*")))))) AND TS=(("Acupuncture Points") OR ("Acupuncture Therapy") OR ("Acupuncture") OR ("acupuncture point") OR ("acupoint*") OR ("needle*") OR ("needling") OR ("Electroacupuncture") OR ("electro-acupuncture") OR ("warm acupuncture") OR ("fire acupuncture") OR ("thermo-acupuncture") OR ("thermoacupuncture") OR ("Ear Acupunctures") OR ("Auricular Acupunctures") OR ("auricular acupuncture") OR ("auriculo-acupuncture") OR ("auriculoacupuncture") OR ("auriculotherapy") OR ("scalp acupuncture") OR ("Abdominal acupuncture") OR ("acupotomy") OR ("Acupotomies") OR ("needle-knife") OR ("Floating Needle") OR ("Plum Blossom Needle") OR ("catgut embedding") OR ("ACET") OR ("acupoint catgut embedding therapy") OR ("catgut implantation") OR ("Wrist-Ankle Acupuncture") OR ("press needling") OR ("intradermal acupuncture")) | 463 | 2025.10.20 |
| Cochrane Library | | | |
| 1 | MeSH descriptor: [Neuralgia, Postherpetic] explode all trees | 398 | 2025.10.20 |
| 2 | MeSH descriptor: [Herpes Zoster] explode all trees | 816 | 2025.10.20 |
| 3 | MeSH descriptor: [Pain] explode all trees | 74377 | 2025.10.20 |
| 4 | MeSH descriptor: [Neuralgia] explode all trees | 2546 | 2025.10.20 |
| 5 | postherpetic neuralgia':ti,ab,kw OR 'herpetic neuralgia':ti,ab,kw OR 'postherpetic pain':ti,ab,kw OR 'phn':ti,ab,kw | 1610 | 2025.10.20 |
| 6 | herpes zoster':ti,ab,kw OR 'shingles':ti,ab,kw OR 'zona':ti,ab,kw OR 'zoster':ti,ab,kw OR 'vzv':ti,ab,kw | 3633 | 2025.10.20 |
| 7 | pain':ti,ab,kw OR 'ache*':ti,ab,kw | 277995 | 2025.10.20 |
| 8 | neuralgia*':ti,ab,kw OR 'neurological pain':ti,ab,kw OR 'neurologic pain':ti,ab,kw OR 'neuralgy':ti,ab,kw OR 'neuralgic pain':ti,ab,kw OR 'nerve pain':ti,ab,kw OR 'nerve pains':ti,ab,kw OR 'neuropathic pain':ti,ab,kw OR 'neuropathic pains':ti,ab,kw OR 'neurodynia*':ti,ab,kw | 36208 | 2025.10.20 |
| 9 | (#2 OR #6) AND (#3 OR #4 OR #7 OR #8) | 1277 | 2025.10.20 |
| 10 | #1 OR #5 OR #9 | 2193 | 2025.10.20 |
| 11 | MeSH descriptor: [Acupuncture Points] explode all trees | 2904 | 2025.10.20 |
| 12 | MeSH descriptor: [Acupuncture Therapy] explode all trees | 7295 | 2025.10.20 |
| 13 | MeSH descriptor: [Acupuncture] explode all trees | 216 | 2025.10.20 |
| 14 | MeSH descriptor: [Electroacupuncture] explode all trees | 1207 | 2025.10.20 |
| 15 | MeSH descriptor: [Acupuncture, Ear] explode all trees | 277 | 2025.10.20 |
| 16 | #11 OR #12 OR #13 OR #14 OR #15 | 7411 | 2025.10.20 |
| 17 | acupuncture points':ti,ab,kw OR 'acupuncture therapy':ti,ab,kw OR 'acupuncture':ti,ab,kw | 23159 | 2025.10.20 |
| 18 | acupuncture point':ti,ab,kw OR 'acupoint*':ti,ab,kw OR 'needle*':ti,ab,kw OR 'needling':ti,ab,kw OR 'electroacupuncture':ti,ab,kw OR 'electro-acupuncture':ti,ab,kw OR 'warm acupuncture':ti,ab,kw OR 'fire acupuncture':ti,ab,kw OR 'thermo-acupuncture':ti,ab,kw OR 'thermoacupuncture':ti,ab,kw OR 'ear acupunctures':ti,ab,kw OR 'auricular acupunctures':ti,ab,kw OR 'auricular acupuncture':ti,ab,kw | 36392 | 2025.10.20 |
| 19 | auriculo-acupuncture':ti,ab,kw OR 'auriculoacupuncture':ti,ab,kw OR 'auriculotherapy':ti,ab,kw OR 'scalp acupuncture':ti,ab,kw OR 'abdominal acupuncture':ti,ab,kw OR 'acupotomy':ti,ab,kw OR 'acupotomies':ti,ab,kw OR 'needle-knife':ti,ab,kw OR 'floating needle':ti,ab,kw OR 'plum blossom needle':ti,ab,kw | 2299 | 2025.10.20 |
| 20 | catgut embedding':ti,ab,kw OR 'acet':ti,ab,kw OR 'acupoint catgut embedding therapy':ti,ab,kw OR 'catgut implantation':ti,ab,kw OR 'press needling':ti,ab,kw OR 'intradermal acupuncture':ti,ab,kw | 573 | 2025.10.20 |
| 21 | #16 OR #17 OR #18 OR #19 OR #20 | 48149 | 2025.10.20 |
| 22 | #10 AND #21 | 222 | 2025.10.20 |
| China National Knowledge Infrastructure (CNKI) | | | |
|  | TKA = ('Herpes zoster neuralgia' + 'Herpetic neuralgia' + 'Postherpetic neuralgia' + ('Herpes zoster' + 'Herpes zoster (variant)' + 'Zoster-like herpes' + 'Spider sore' + 'Snake-like herpes' + 'Snake-like erythema') * ('Pain' + 'Aching' + 'Pain syndrome' + 'Neuralgia' + 'Neurological pain' + 'Nerve ache')) AND TKA = ('Acupuncture' + 'Acupuncture and moxibustion' + 'Body acupuncture' + 'Electroacupuncture' + 'Warm acupuncture' + 'Fire acupuncture' + 'Red-hot needle' + 'Auricular acupuncture' + 'Ear point embedding' + 'Ear acupuncture' + 'Scalp acupuncture' + 'Head acupuncture' + 'Abdominal acupuncture' + 'Acupotomy' + 'Sword-shaped needle' + 'Beryl knife' + 'Pi-needle' + 'Floating needle' + 'Plum blossom needle' + 'Seven-star needle' + 'Catgut embedding' + 'Wrist-ankle acupuncture' + 'Needle embedding') | 2946 | 2025.10.21 |
| Wanfang Data | | | |
|  | Abstract: (Postherpetic neuralgia OR Herpetic neuralgia OR Herpes zoster neuralgia OR (Herpes zoster OR Herpes zoster (variant) OR Zoster-like herpes OR Spider sore OR Snake-like herpes OR Snake-like erythema) AND (Pain OR Aching OR Pain syndrome OR Neuralgia OR Neurological pain OR Nerve ache)) and Abstract: (Acupuncture OR Acupuncture and moxibustion OR Body acupuncture OR Electroacupuncture OR Warm acupuncture OR Fire acupuncture OR Red-hot needle OR Auricular acupuncture OR Ear point embedding OR Ear acupuncture OR Scalp acupuncture OR Head acupuncture OR Abdominal acupuncture OR Acupotomy OR Sword-shaped needle OR Beryl knife OR Pi-needle OR Floating needle OR Plum blossom needle OR Seven-star needle OR Catgut embedding OR Wrist-ankle acupuncture OR Needle embedding OR Intradermal needle OR Press needle) | 3192 | 2025.10.21 |
| VIP Database for Chinese Technical Periodicals (VIP) | | | |
|  | R = (Postherpetic neuralgia OR Herpetic neuralgia OR Herpes zoster neuralgia OR (Herpes zoster OR Herpes zoster (variant) OR Zoster-like herpes OR Spider sore OR Snake-like herpes OR Snake-like erythema) AND (Pain OR Aching OR Pain syndrome OR Neuralgia OR Neurological pain OR Nerve ache)) AND R = (Acupuncture OR Acupuncture and moxibustion OR Body acupuncture OR Electroacupuncture OR Warm acupuncture OR Fire acupuncture OR Red-hot needle OR Auricular acupuncture OR Ear point embedding OR Ear acupuncture OR Scalp acupuncture OR Head acupuncture OR Abdominal acupuncture OR Acupotomy OR Sword-shaped needle OR Beryl knife OR Pi-needle OR Floating needle OR Plum blossom needle OR Seven-star needle OR Catgut embedding OR Wrist-ankle acupuncture OR Needle embedding OR Intradermal needle OR Press needle) | 2130 | 2025.10.22 |
| Chinese Biomedical Literature Database (CBM) | | | |
|  | (((("Herpes zoster"[Common field: Smart] OR "Herpes zoster (variant)"[Common field: Smart] OR "Zoster-like herpes"[Common field: Smart] OR "Snake-like herpes"[Common field: Smart] OR "Snake-like erythema"[Common field: Smart] OR "Spider sore"[Common field: Smart]) OR ("Herpes zoster"[Unweighted: Explode])) AND (("Pain"[Common field: Smart] OR "Aching"[Common field: Smart] OR "Pain syndrome"[Common field: Smart] OR "Neuralgia"[Common field: Smart] OR "Neurological pain"[Common field: Smart] OR "Nerve ache"[Common field: Smart]) OR ("Neuralgia"[Unweighted: Explode]) OR ("Pain"[Unweighted: Explode]))) OR ("Postherpetic neuralgia"[Common field: Smart] OR "Herpetic neuralgia"[Common field: Smart] OR "Herpes zoster neuralgia"[Common field: Smart]) OR ("Postherpetic neuralgia"[Unweighted: Explode])) AND (("Acupuncture"[Common field: Smart] OR "Acupuncture and moxibustion"[Common field: Smart] OR "Body acupuncture"[Common field: Smart] OR "Electroacupuncture"[Common field: Smart] OR "Warm acupuncture"[Common field: Smart] OR "Fire acupuncture"[Common field: Smart] OR "Red-hot needle"[Common field: Smart] OR "Auricular acupuncture"[Common field: Smart] OR "Ear point embedding"[Common field: Smart] OR "Ear acupuncture"[Common field: Smart] OR "Scalp acupuncture"[Common field: Smart] OR "Head acupuncture"[Common field: Smart] OR "Abdominal acupuncture"[Common field: Smart] OR "Acupotomy"[Common field: Smart] OR "Sword-shaped needle"[Common field: Smart] OR "Beryl knife"[Common field: Smart] OR "Pi-needle"[Common field: Smart] OR "Floating needle"[Common field: Smart] OR "Plum blossom needle"[Common field: Smart] OR "Seven-star needle"[Common field: Smart] OR "Catgut embedding"[Common field: Smart] OR "Wrist-ankle acupuncture"[Common field: Smart] OR "Needle embedding"[Common field: Smart] OR "Intradermal needle"[Common field: Smart] OR "Press needle"[Common field: Smart]) OR ("Acupuncture"[Unweighted: Explode] OR "Acupuncture therapy"[Unweighted: Explode] OR "Acupoints"[Unweighted: Explode] OR "Acupuncture and moxibustion therapy"[Unweighted: Explode] OR "Electroacupuncture therapy"[Unweighted: Explode] OR "Electroacupuncture"[Unweighted: Explode] OR "Warm acupuncture therapy"[Unweighted: Explode] OR "Fire acupuncture therapy"[Unweighted: Explode] OR "Ear acupuncture therapy"[Unweighted: Explode] OR "Auricular acupuncture"[Unweighted: Explode] OR "Ear acupuncture points"[Unweighted: Explode] OR "Head acupuncture therapy"[Unweighted: Explode] OR "Abdominal acupuncture therapy"[Unweighted: Explode] OR "Pi-needle"[Unweighted: Explode] OR "Acupotomy therapy"[Unweighted: Explode] OR "Floating needle therapy"[Unweighted: Explode] OR "Plum blossom needle"[Unweighted: Explode] OR "Plum blossom needle therapy"[Unweighted: Explode] OR "Catgut embedding therapy"[Unweighted: Explode] OR "Wrist-ankle acupuncture therapy"[Unweighted: Explode] OR "Intradermal needle therapy"[Unweighted: Explode])) | 3210 | 2025.10.22 |

Supplementary Table 1: Search strategies

**Note:** For the following four Chinese databases: China National Knowledge Infrastructure (CNKI), Wanfang Data, VIP Database for Chinese Technical Periodicals (VIP), and Chinese Biomedical Literature Database (CBM), the actual search was conducted using original Chinese search terms. The search strategies presented in this document are English translation versions provided for the reference of the editors and peer reviewers.

**Appendix 2 Forest plot of secondary outcome indicators**

**
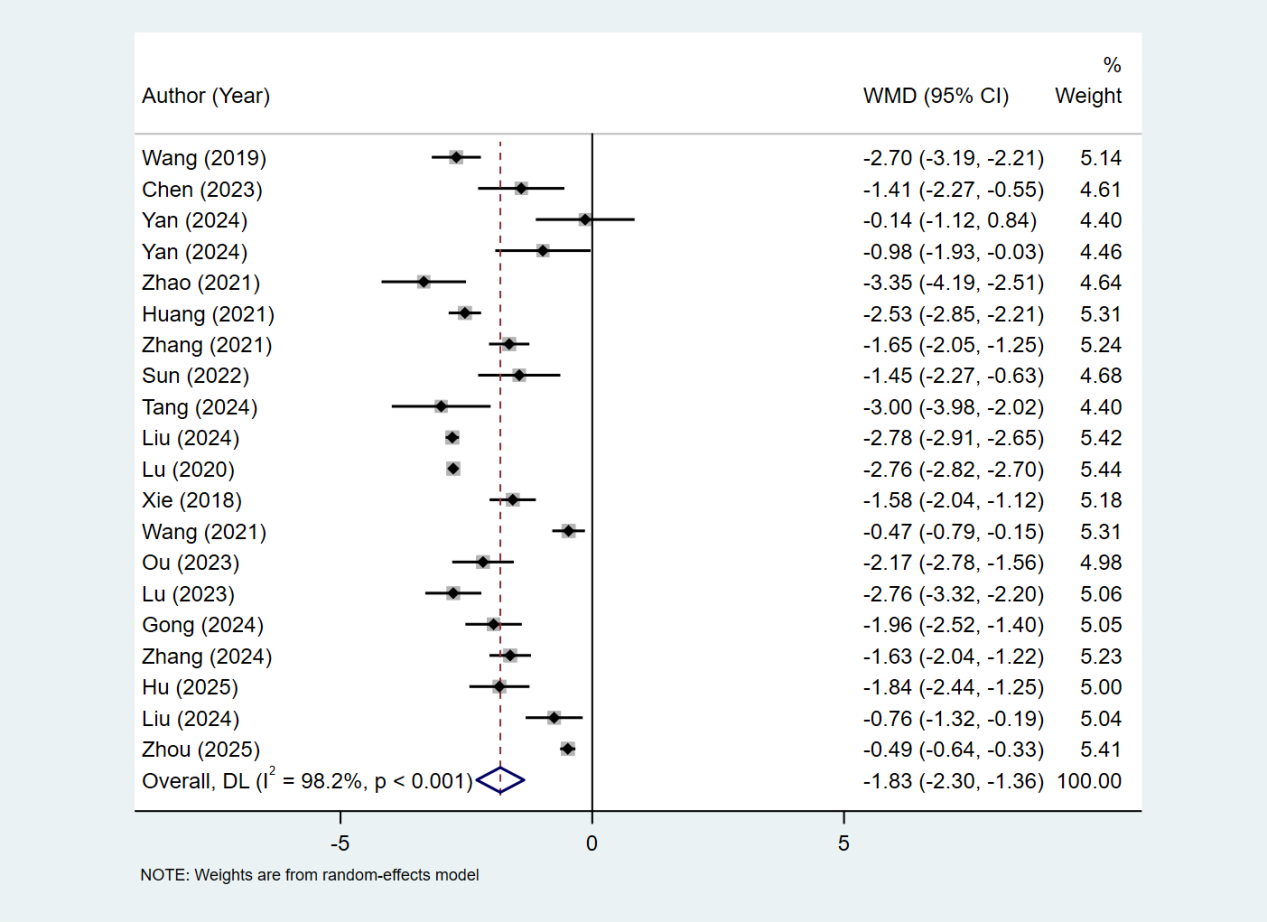
**

Supplementary Figure 1: Pain intensity

**
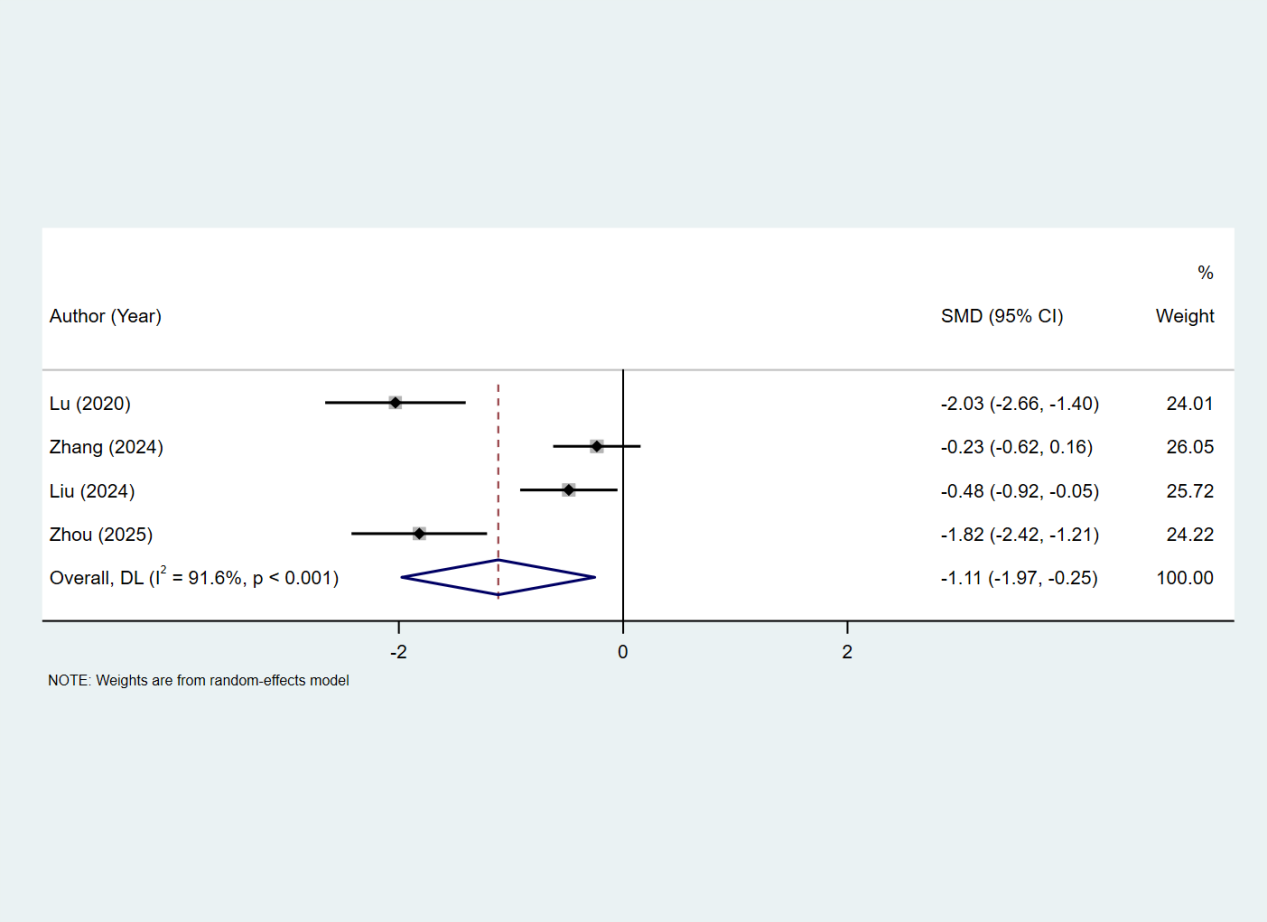
**

Supplementary Figure 2: Anxiety severity

**
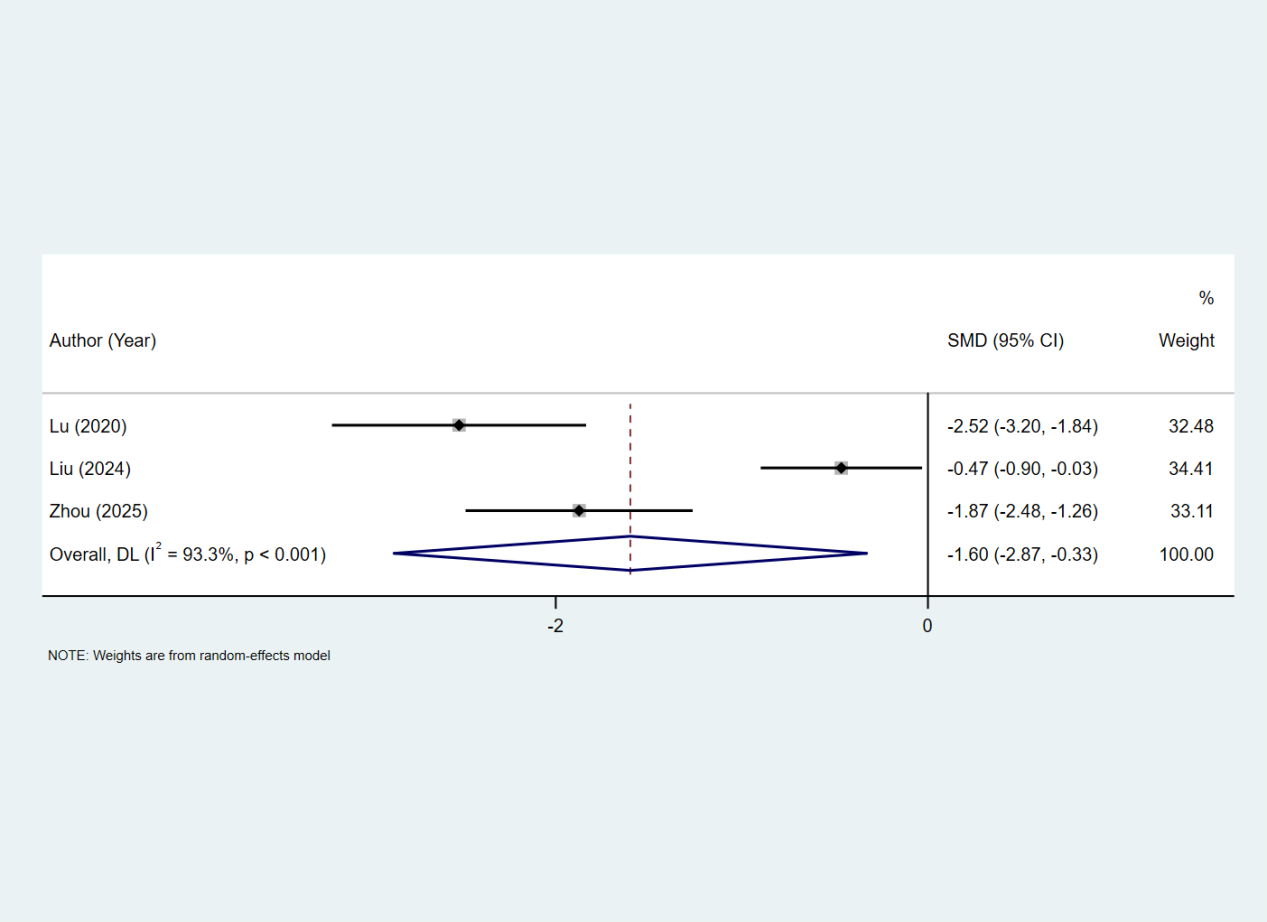
**

Supplementary Figure 3: Depression severity

**
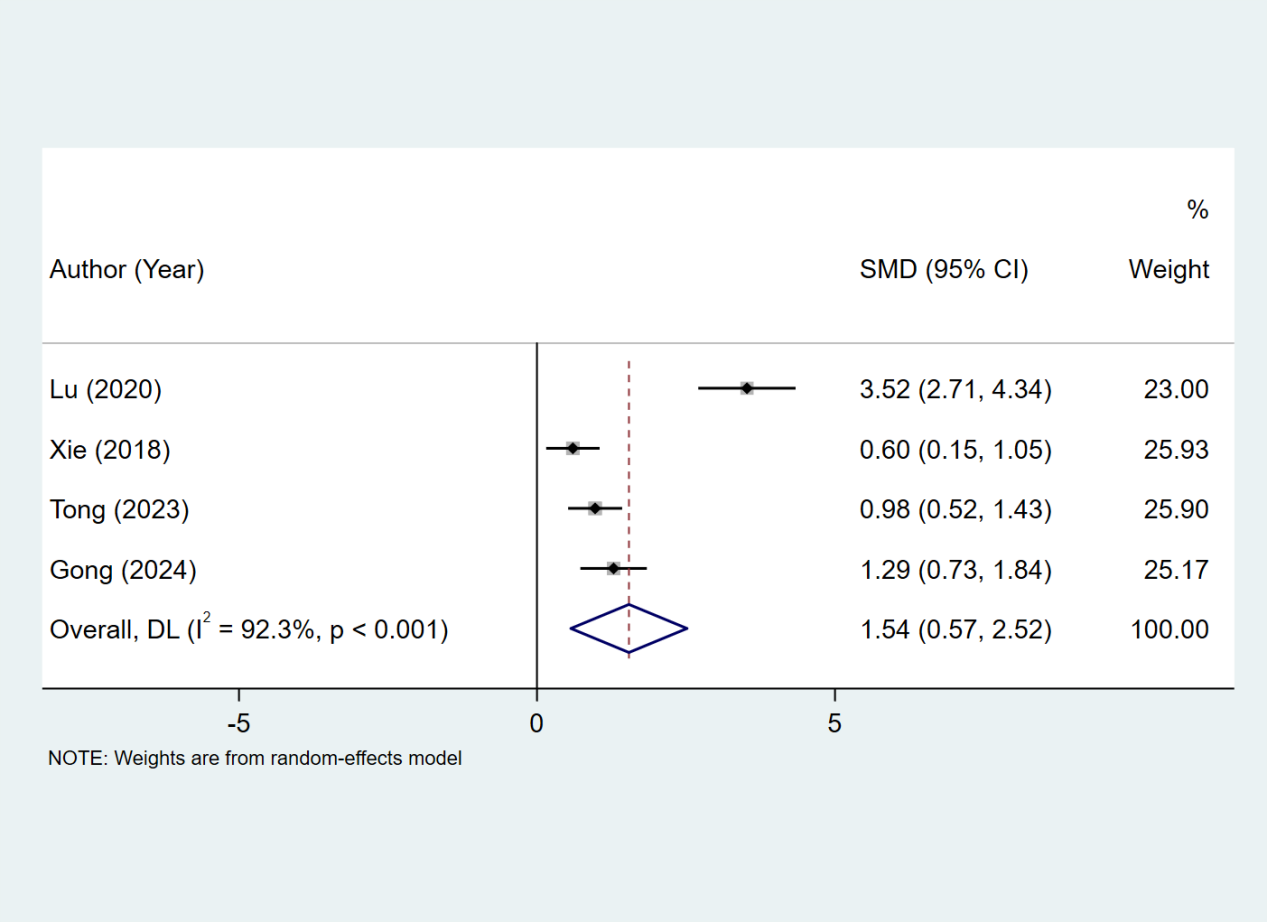
**

Supplementary Figure 4: Quality of life

**
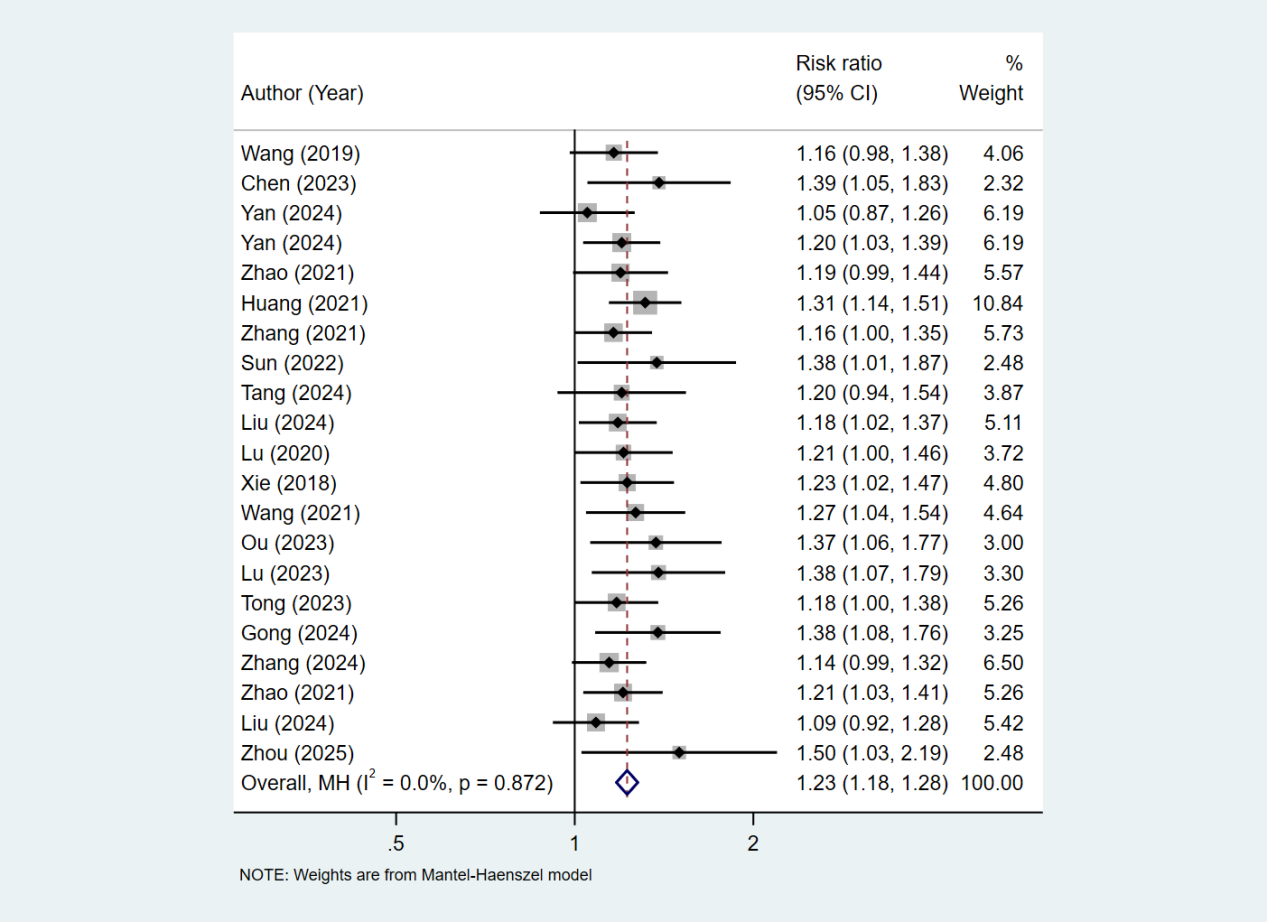
**

Supplementary Figure 5: Clinical effectiveness

**
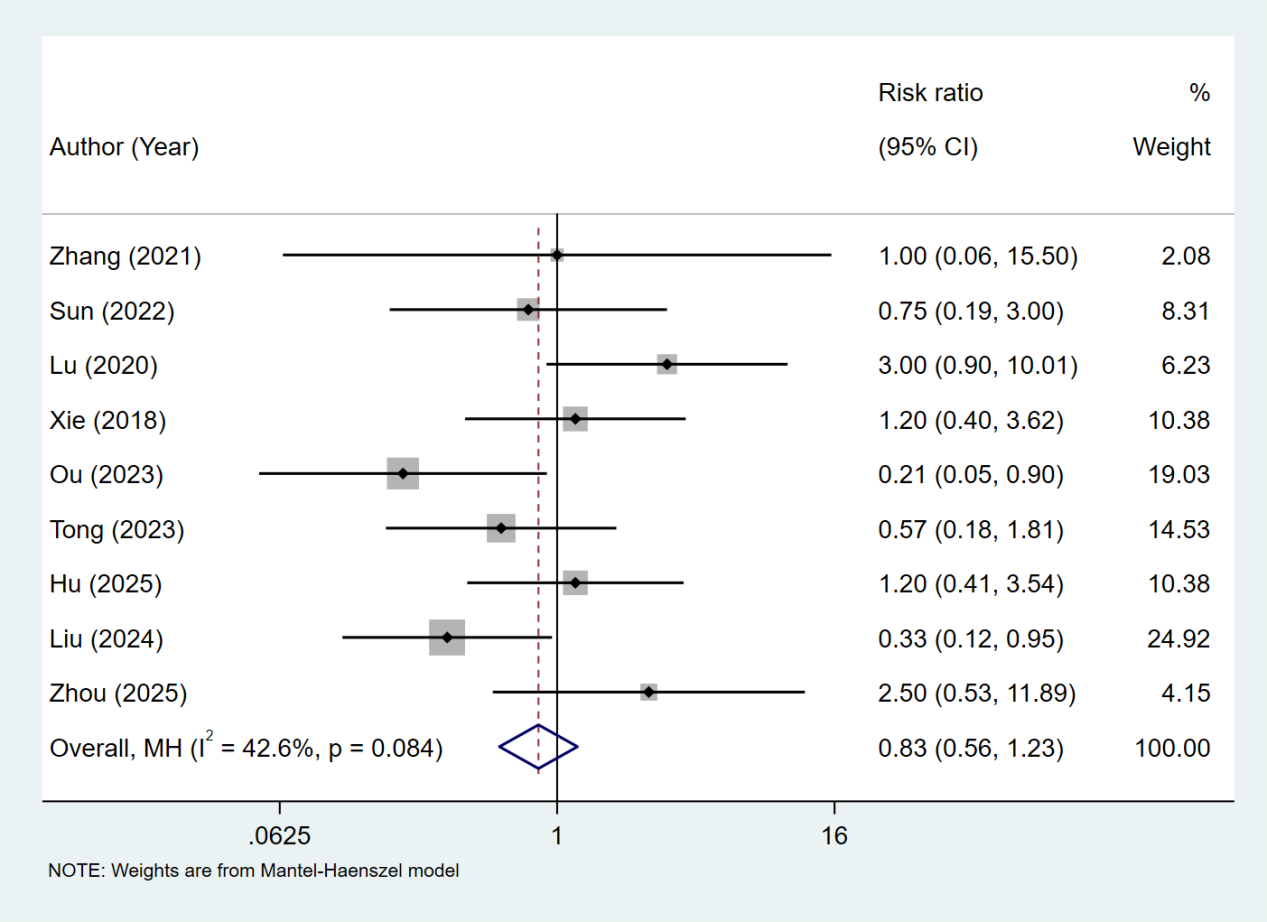
**

Supplementary Figure 6: Adverse events

**Appendix 3 Sensitivity analysis**

**
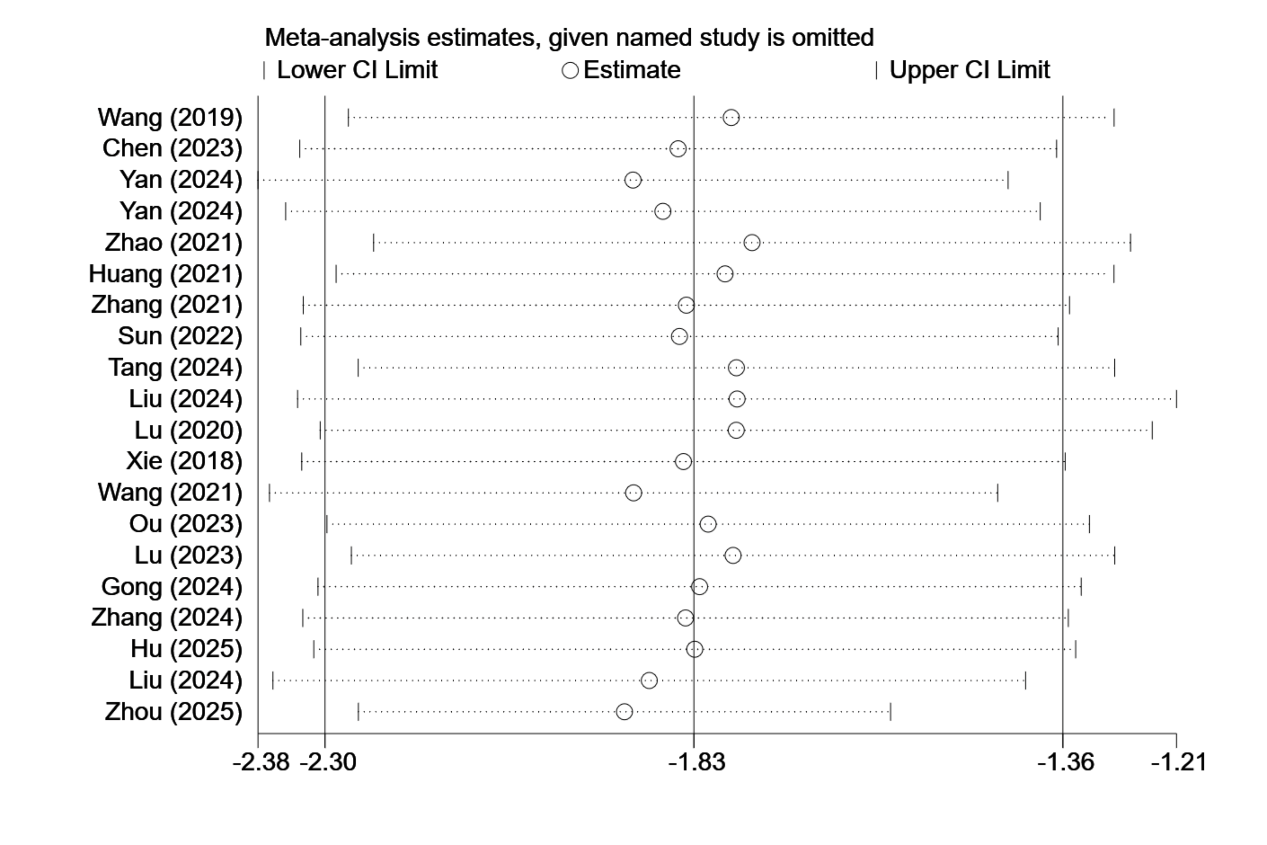
**

Supplementary Figure 7: Sensitivity analysis of Pain intensity

**
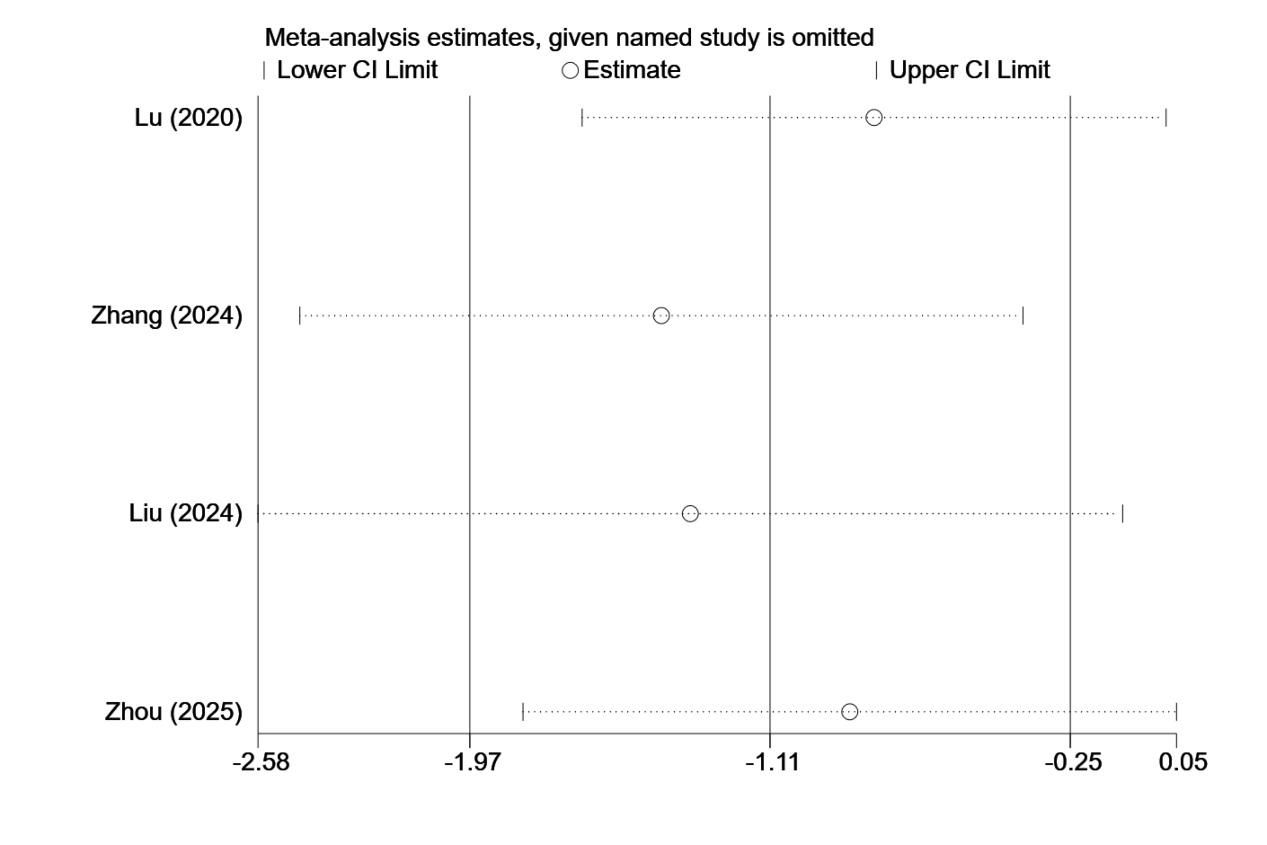
**

Supplementary Figure 8: Sensitivity analysis of Anxiety severity

**
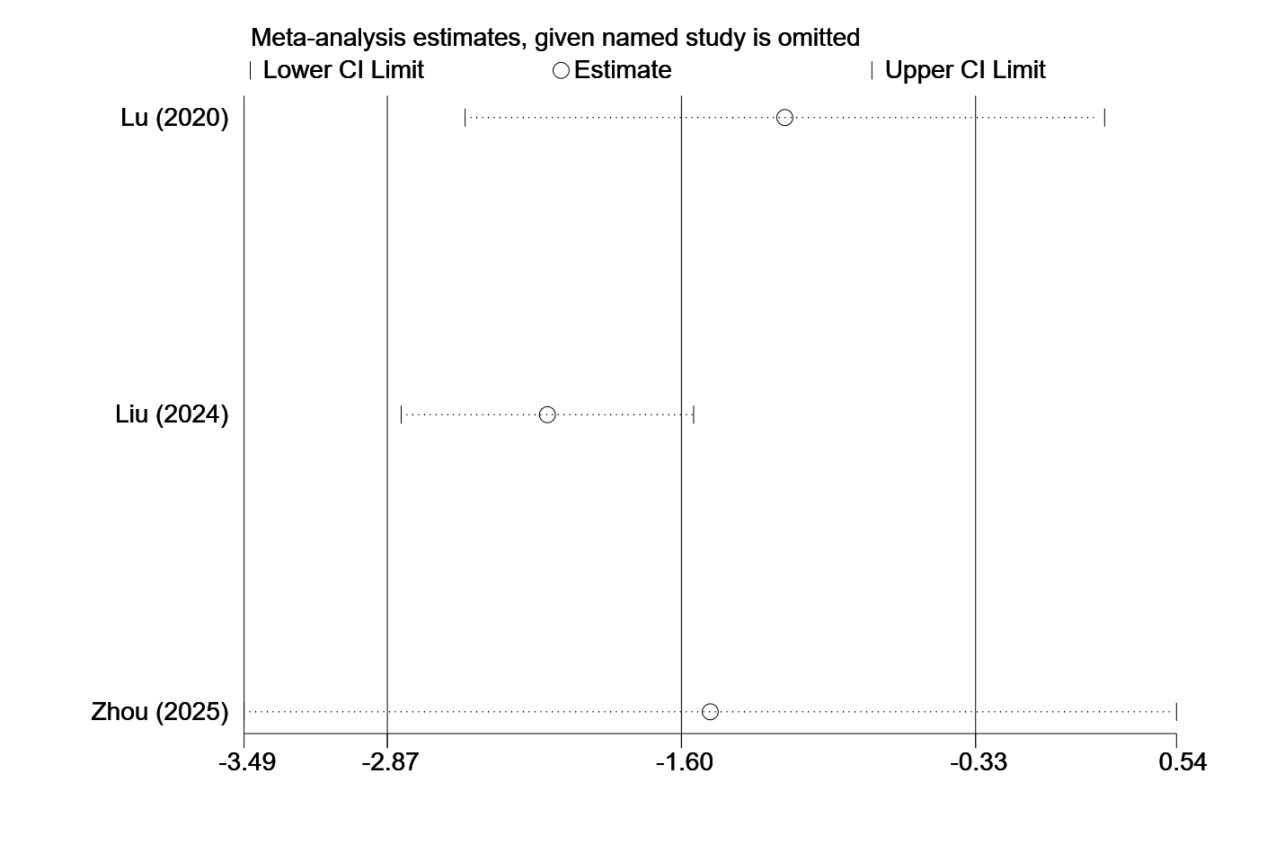
**

Supplementary Figure 9: Sensitivity analysis of Depression severity

**
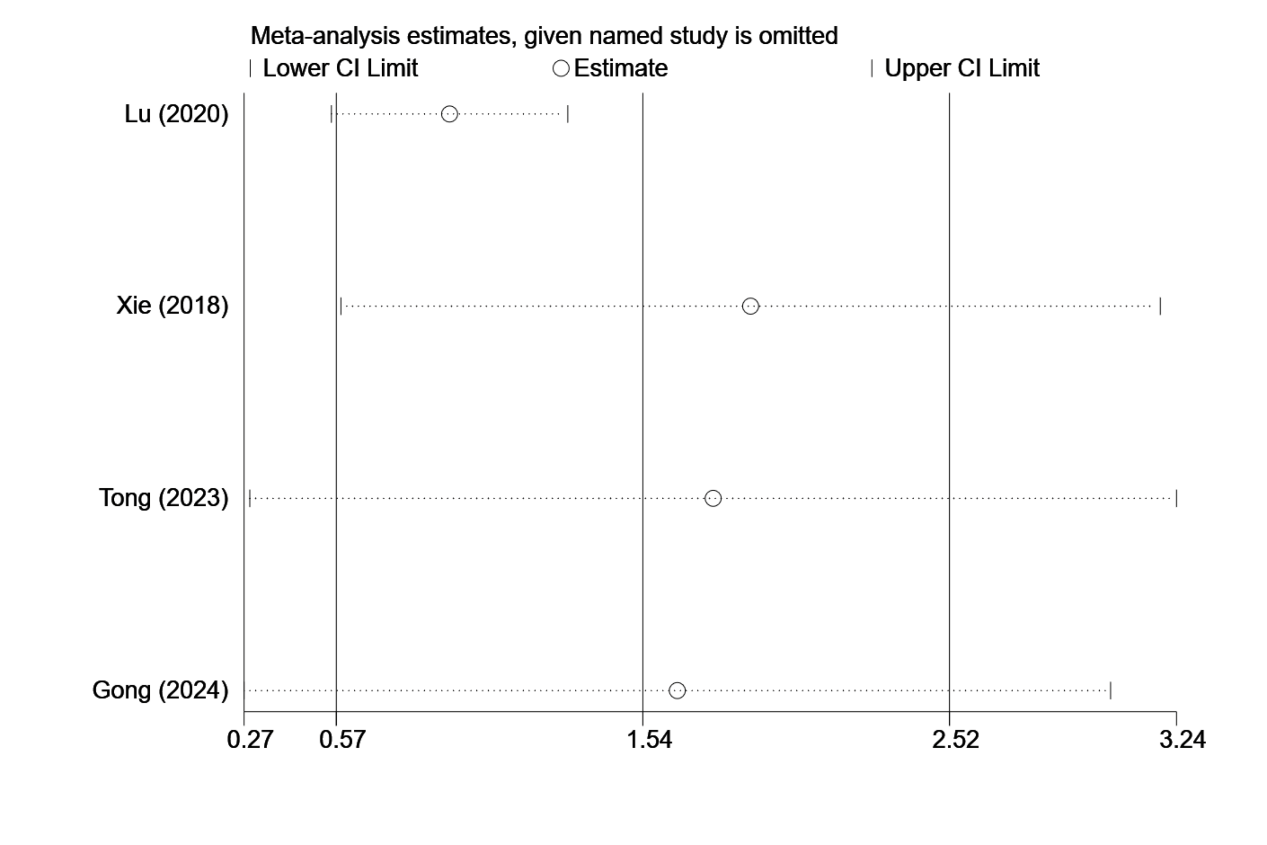
**

Supplementary Figure 10: Sensitivity analysis of Quality of life

**
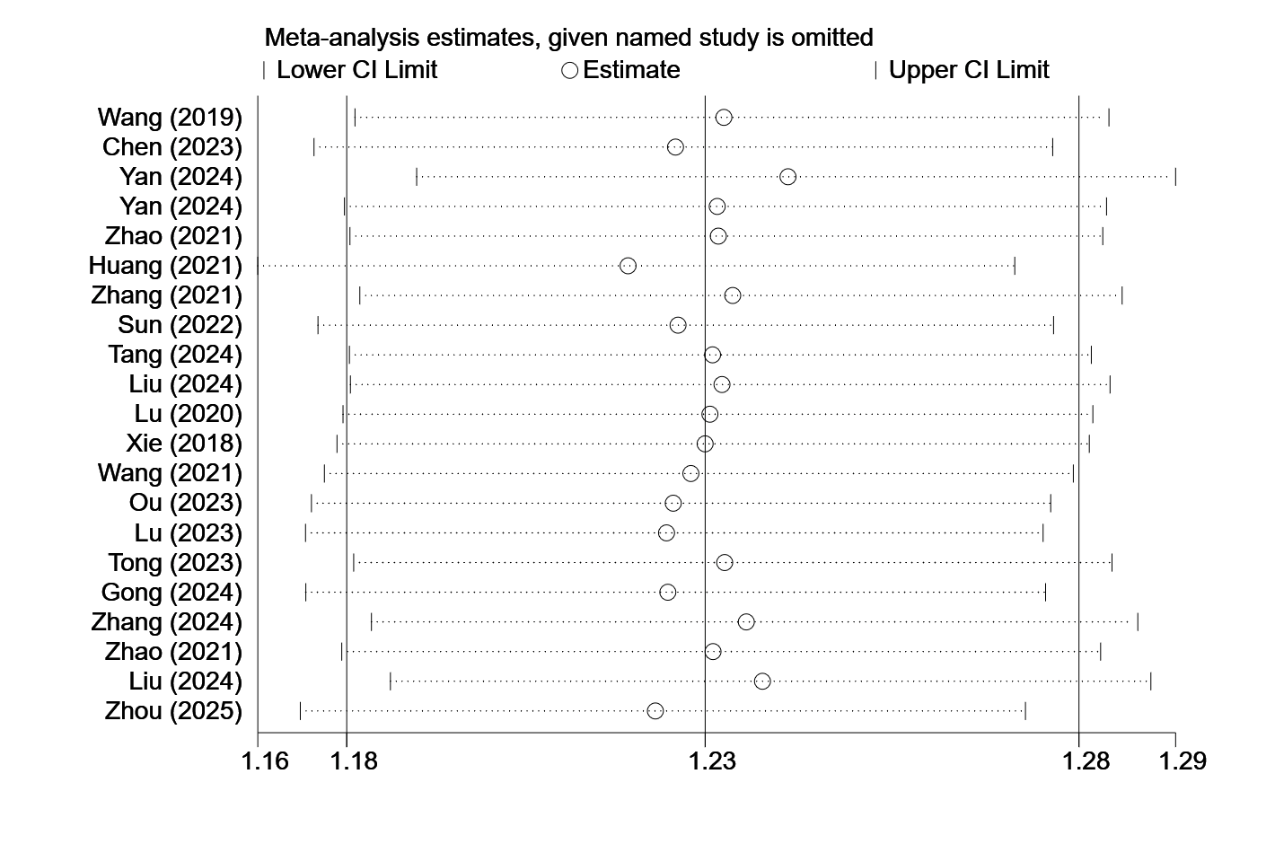
**

Supplementary Figure 11: Sensitivity analysis of Clinical effectiveness

**
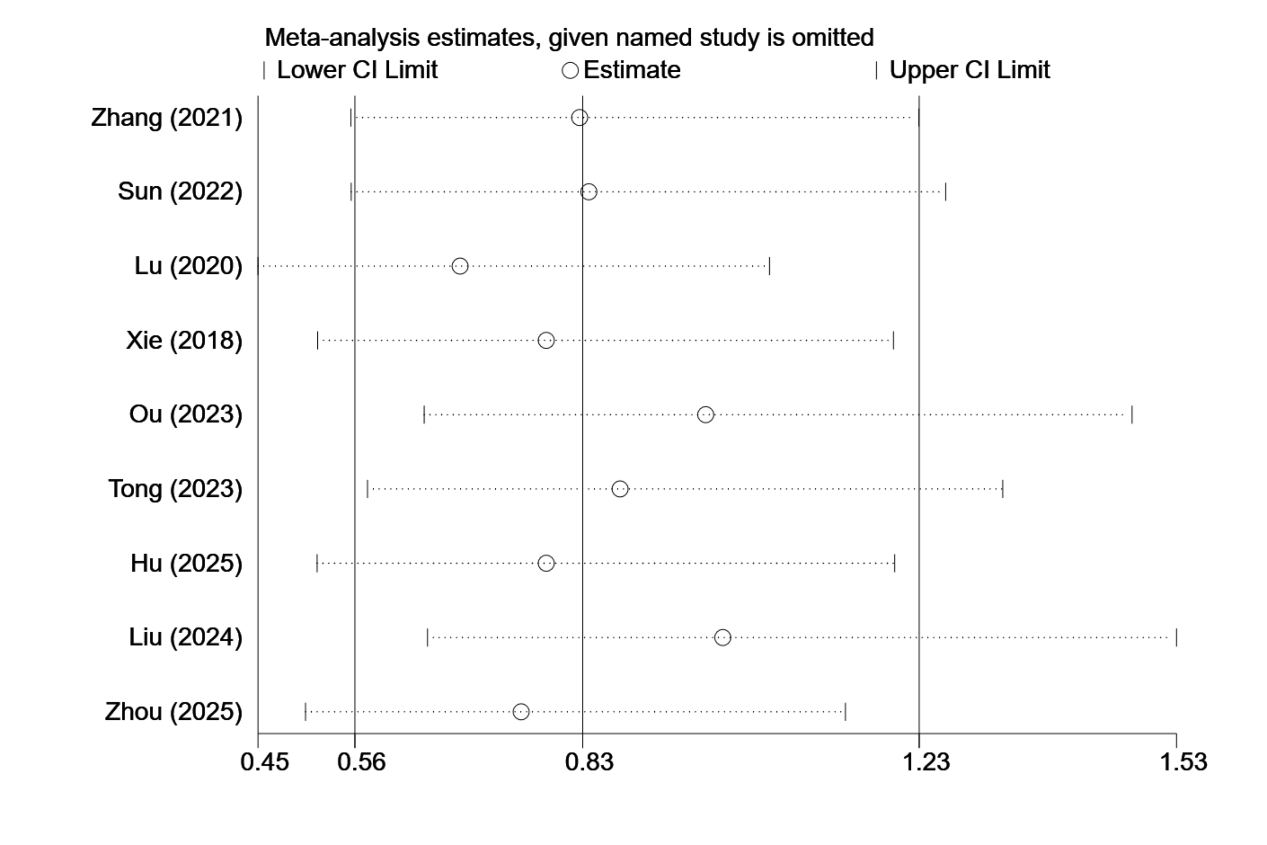
**

Supplementary Figure 12: Sensitivity analysis of Adverse events

**Appendix 4 Funnel plot and trim and fill method**

**
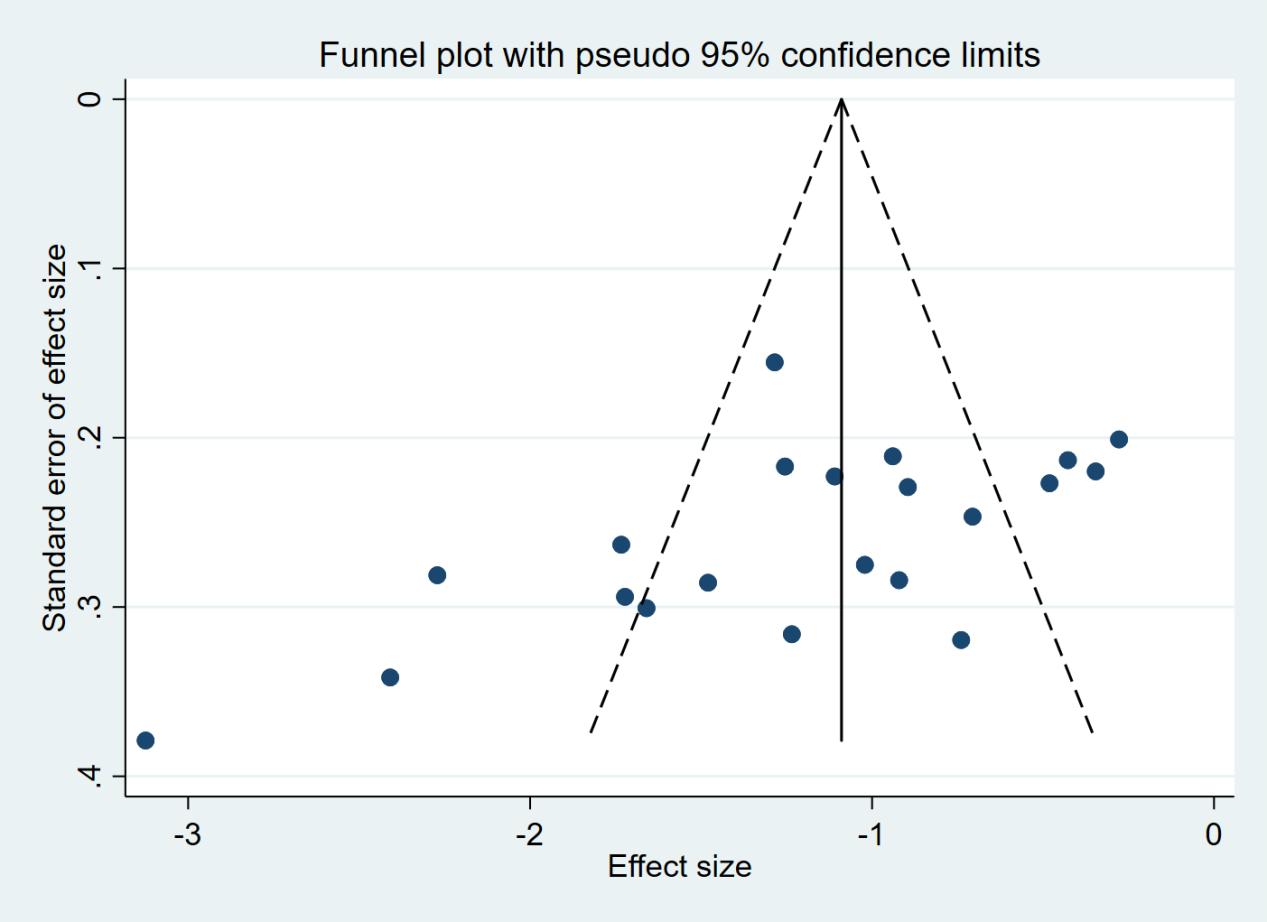
**

Supplementary Figure 13: Funnel plot of Sleep quality

**
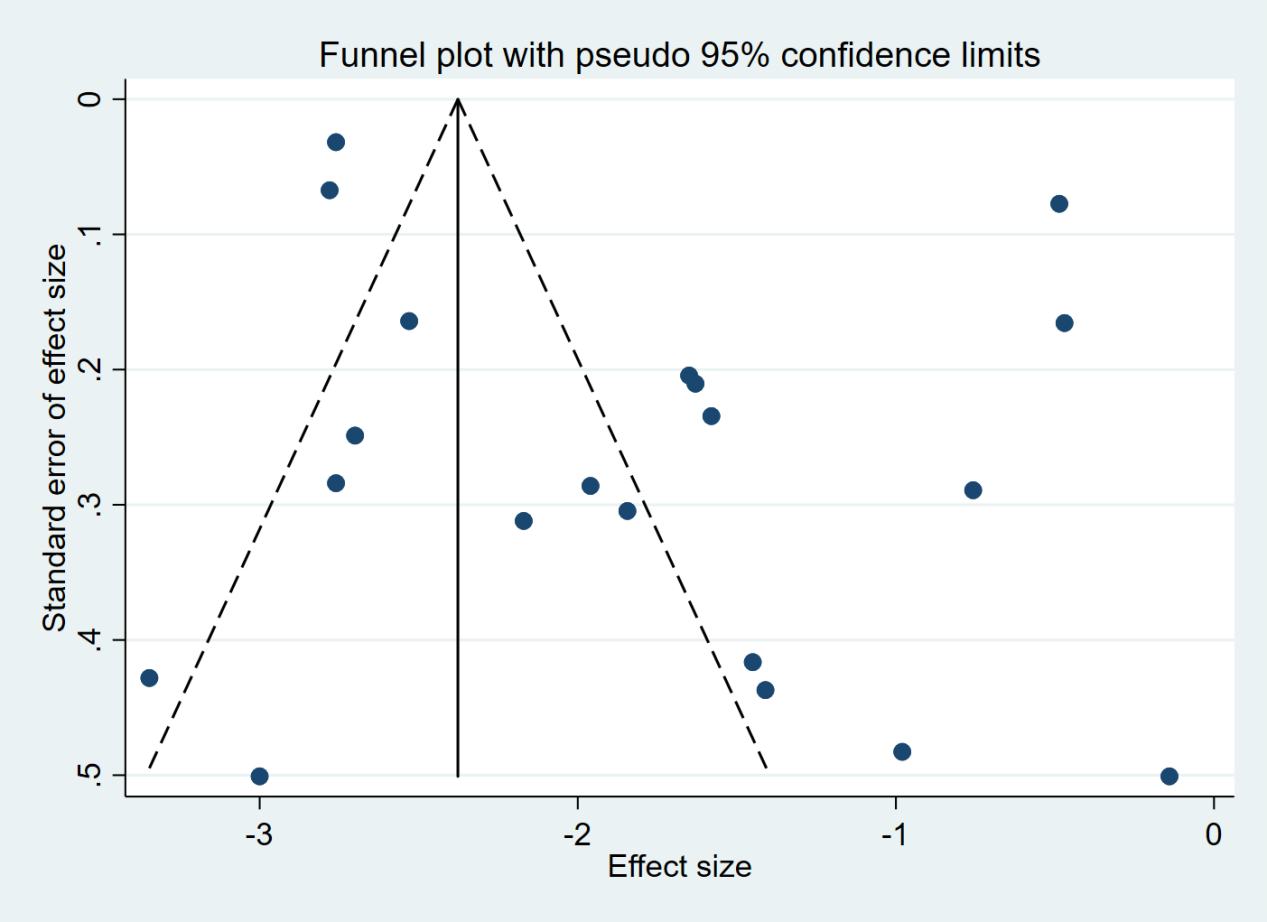
**

Supplementary Figure 14: Funnel plot of Pain intensity

**
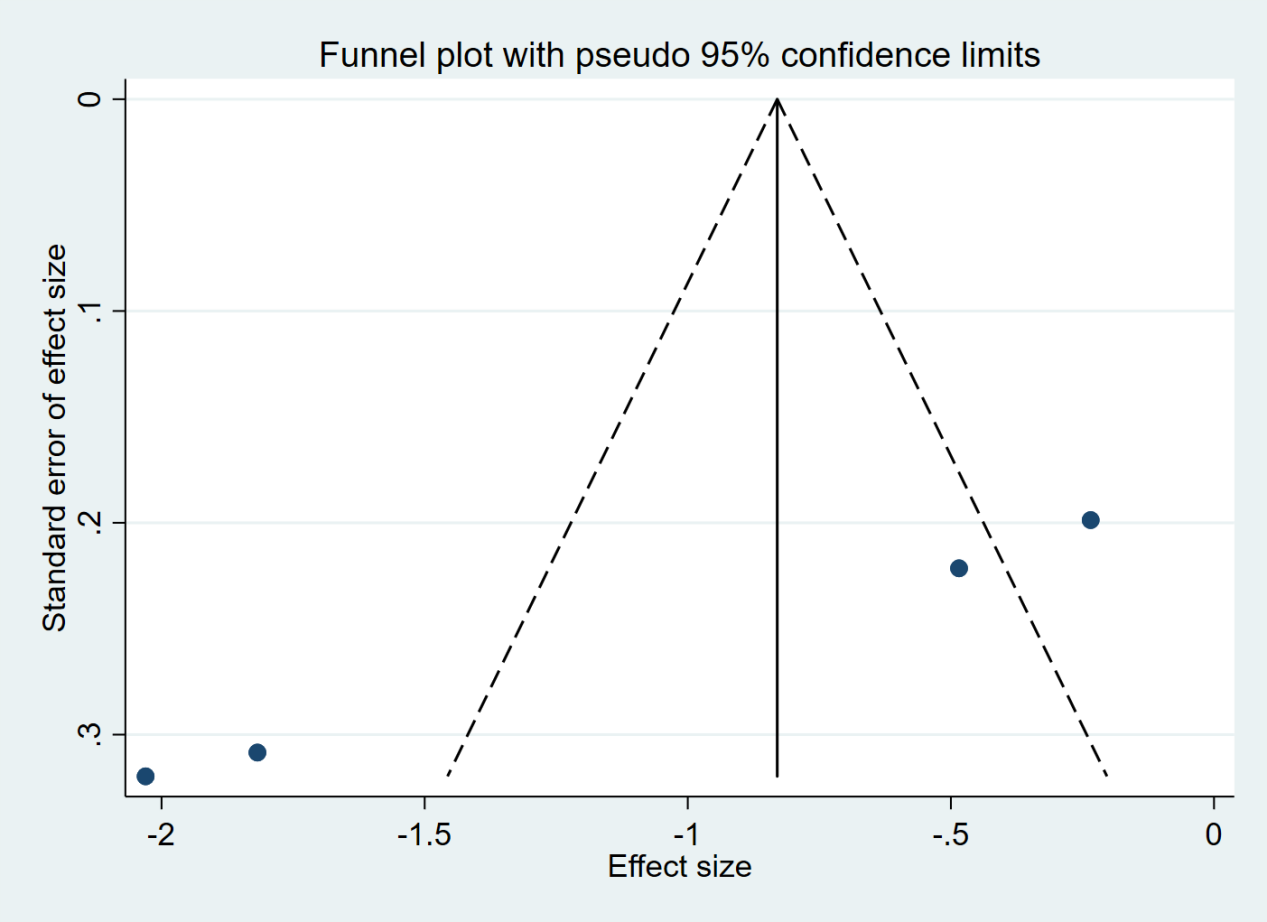
**

Supplementary Figure 15: Funnel plot of Anxiety severity

**
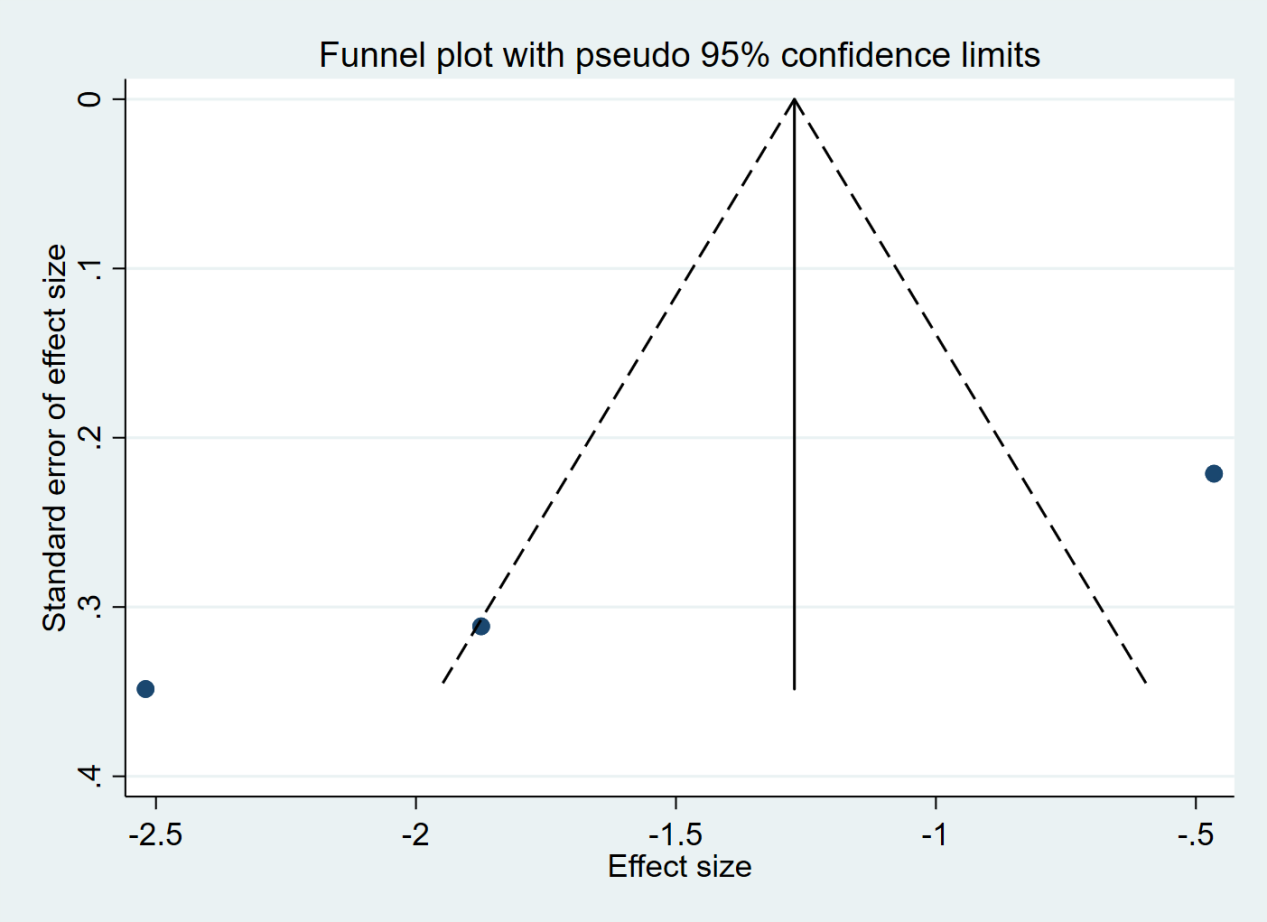
**

Supplementary Figure 16: Funnel plot of Depression severity

**
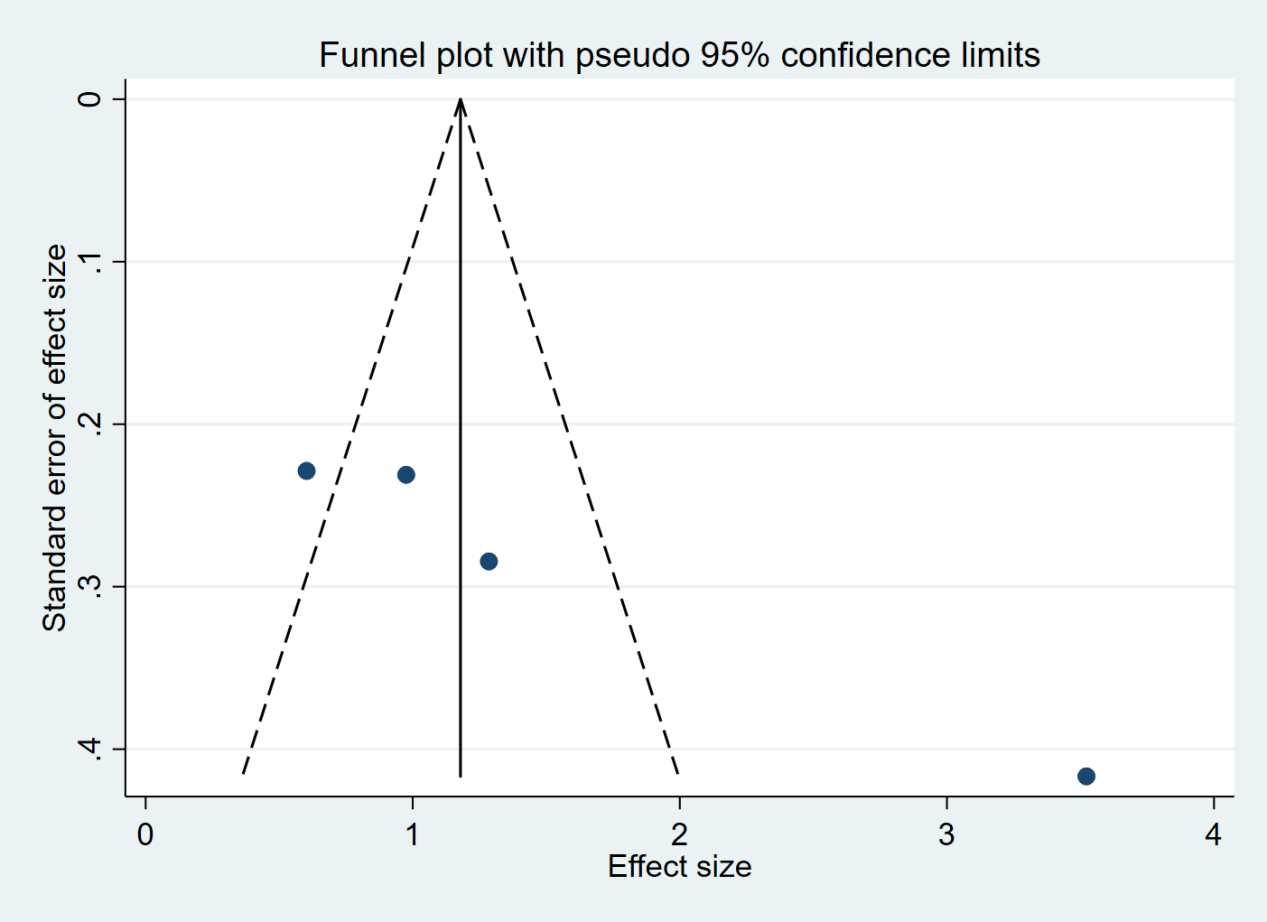
**

Supplementary Figure 17: Funnel plot of Quality of life

**
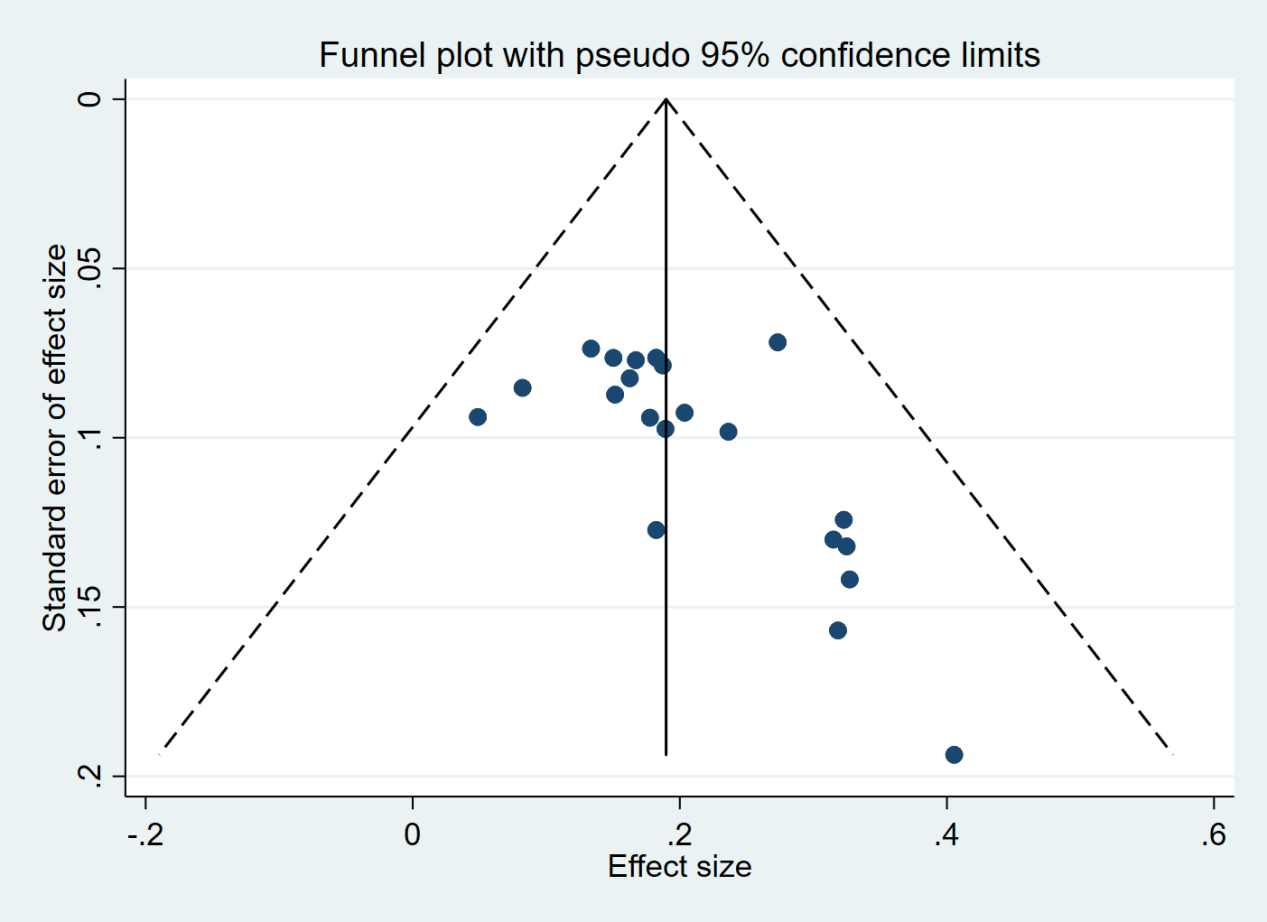
**

Supplementary Figure 18: Funnel plot of Clinical effectiveness

**
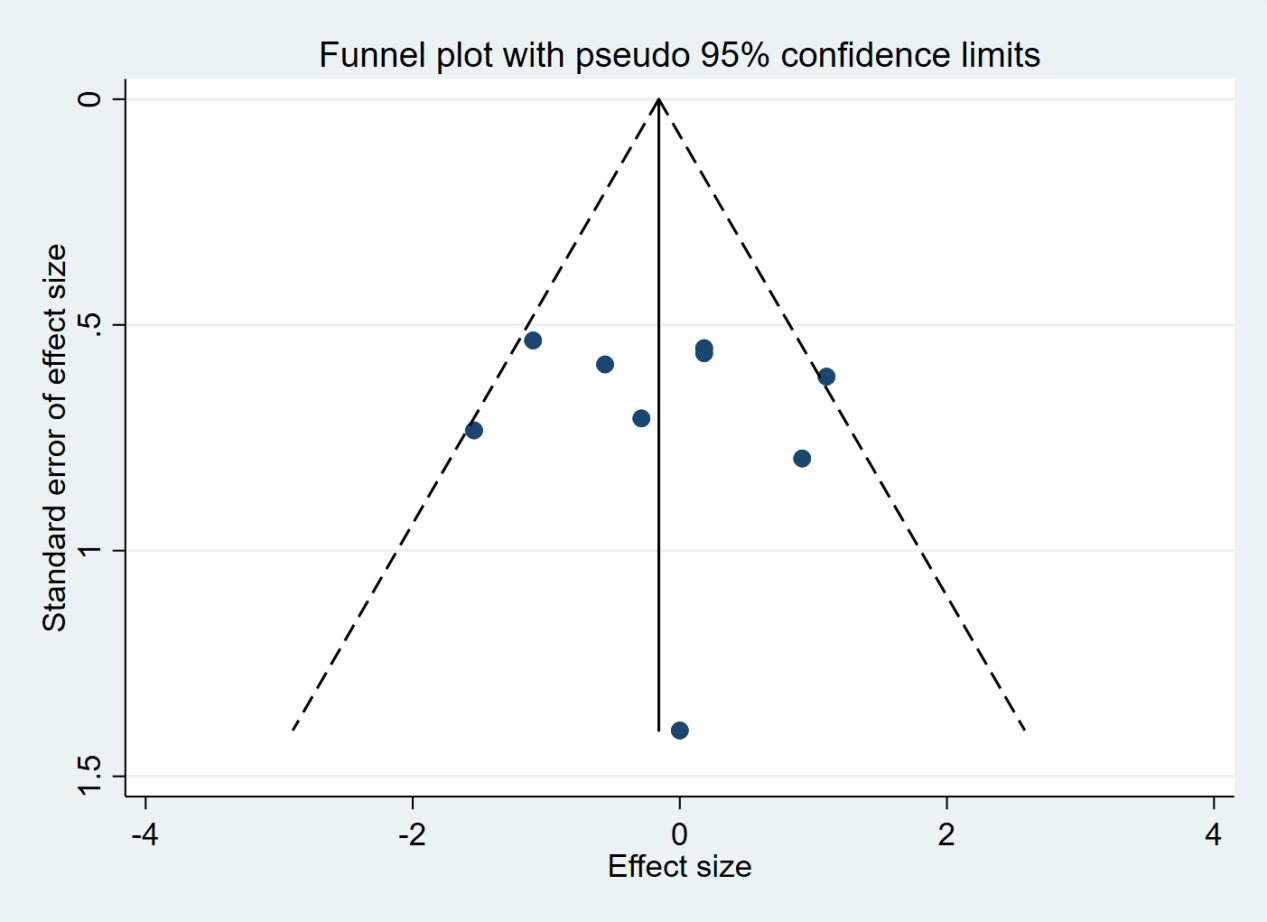
**

Supplementary Figure 19: Funnel plot of Adverse events

**
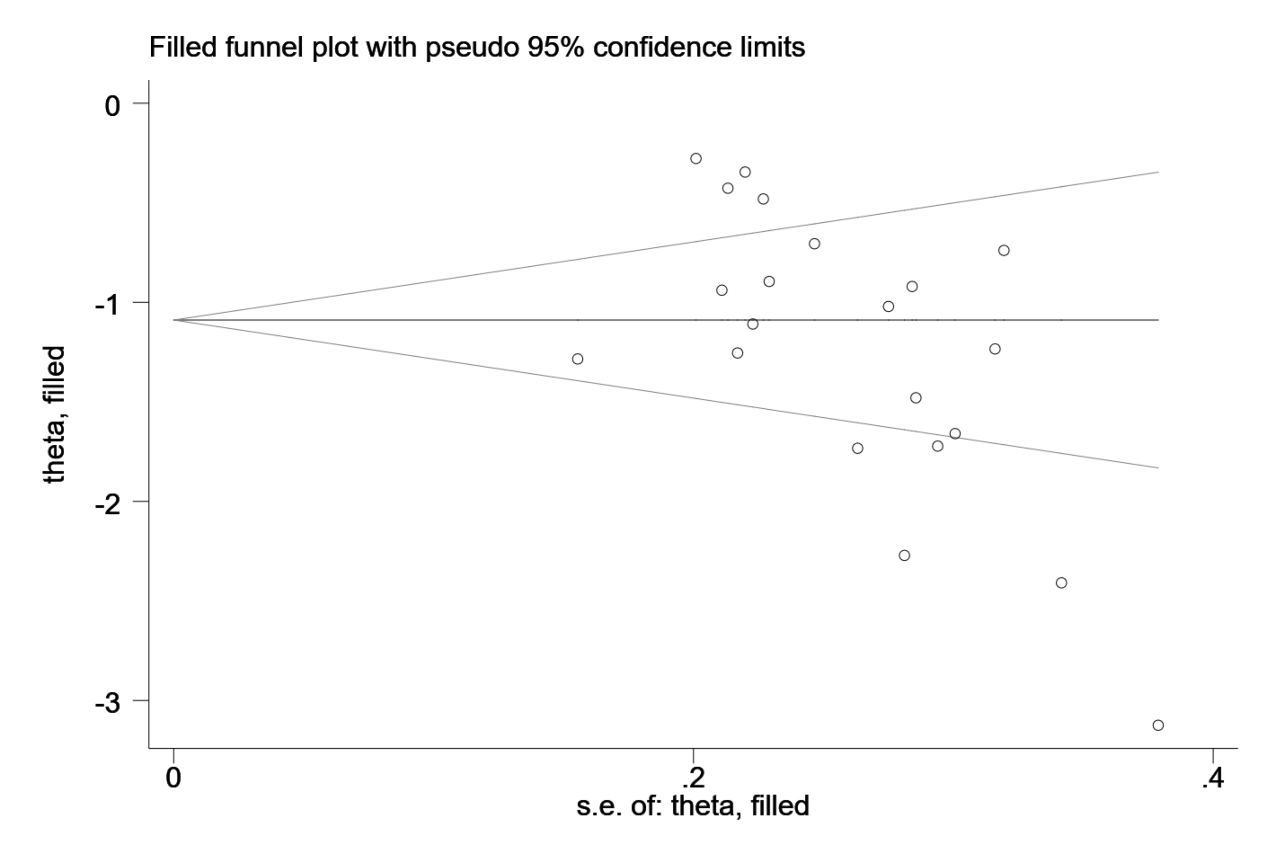
**

Supplementary Figure 20: Trim and fill method of Sleep quality

**
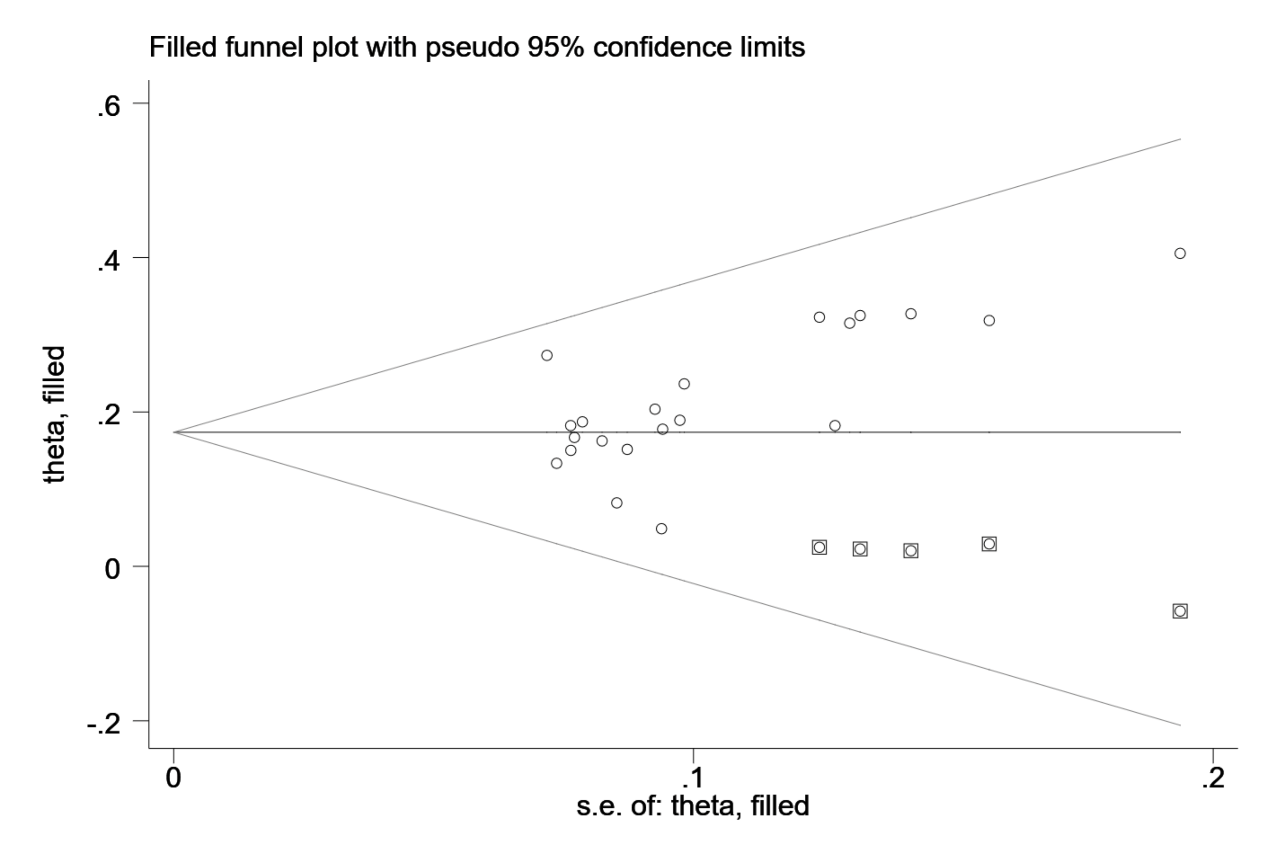
**

Supplementary Figure 21: Trim and fill method of Clinical effectiveness

**Appendix 5 Diagnostic references and duration definitions of included studies**

| **No.** | **First author** | **Publication year** | **Specific Diagnostic Reference / Guideline** | **PHN Duration Definition** |
| --- | --- | --- | --- | --- |
| 1 | Wang | 2019 | Not explicitly reported | ≥1 month after rash has healed |
| 2 | Chen | 2023 | Jia Jianping, *Neurology* (7th Edition) | PHN duration >1 month |
| 3 | Yan | 2024 | State Administration of Traditional Chinese Medicine, *Diagnosis and Efficacy Criteria for TCM Syndromes* (2022 Edition) | Localized pain persists even after the rash has subsided; the exact duration is not specified. |
| 4 | Zhao | 2021 | *1.Chinese Expert Consensus on the Diagnosis and Treatment of Postherpetic Neuralgia* (2016 Edition)  2. Wang Jiashuang, *Interpretation of Chinese Multidisciplinary Expert Consensus on Clinical Diagnosis and Treatment of Postherpetic Neuralgia* (2016 Edition) | Pain persisting for over 4 weeks after herpes zoster rash resolution |
| 5 | Huang | 2021 | 1. *China Expert Consensus on Herpes Zoster* (2018 Edition)  2. *TCM Clinical Practice Guidelines for Shechuanchuang (Herpes Zoster)* (2014 Revised Edition) | Not explicitly reported. The original text only states that patients with a PHN duration of more than one year will be excluded. |
| 6 | Zhang | 2021 | Yang Huilan, *Interpretation of China Expert Consensus on Herpes Zoster* (2018 Edition) | Not explicitly reported |
| 7 | Sun | 2022 | *Chinese Expert Consensus on the Diagnosis and Treatment of Postherpetic Neuralgia* (2016 Edition) | Pain persists for ≥1 month after the skin lesion has healed |
| 8 | Tang | 2024 | 1. *Chinese Expert Consensus on the Diagnosis and Treatment of Postherpetic Neuralgia* (2016 Edition)  2. *TCM Clinical Practice Guidelines for Shechuanchuang (Herpes Zoster)* (2014 Revised Edition)  3. State Administration of Traditional Chinese Medicine, *Diagnosis and Efficacy Criteria for TCM Syndromes* (1994 Edition) | Pain persisting for over 1 month after rash resolution |
| 9 | Liu | 2024 | *Chinese Expert Consensus on the Diagnosis and Treatment of Postherpetic Neuralgia* (2016 Edition) | 1 month after herpes zoster onset |
| 10 | Lu | 2020 | Zhao Bian, *Clinical Dermatology of China* (2nd Edition) | Not explicitly reported |
| 11 | Liu | 2024 | *Chinese Expert Consensus on the Diagnosis and Treatment of Postherpetic Neuralgia* (2016 Edition) | Diverse symptoms of neuralgia persisted for more than one month after the local skin lesions had healed |
| 12 | Xie | 2018 | Not explicitly reported | Not explicitly reported |
| 13 | Zhou | 2025 | 1. *China Expert Consensus on Herpes Zoster* (2018 Edition)  2. Medical Affairs Department of State Administration of Traditional Chinese Medicine, *Diagnosis and Efficacy Criteria for TCM Syndromes* (2016 Edition) | The patient experiences persistent pain that has persisted for more than 1 month. |
| 14 | Wang | 2021 | Zheng Zhizhong, *Dermatology* (2009 Edition) | Not explicitly reported |
| 15 | OU | 2023 | *Chinese Expert Consensus on the Diagnosis and Treatment of Postherpetic Neuralgia* (2016 Edition) | Not explicitly reported |
| 16 | Lu | 2023 | Not explicitly reported | After the skin heals from shingles, the affected area experiences postherpetic neuralgia that lasts for one month or longer. |
| 17 | Tong | 2023 | 1. *Chinese Expert Consensus on the Diagnosis and Treatment of Postherpetic Neuralgia* (2016 Edition)   2. *TCM Clinical Practice Guidelines for Shechuanchuang (Herpes Zoster)* (2014 Revised Edition) | Pain persisting for at least 1 month |
| 18 | Gong | 2024 | *Chinese Expert Consensus on the Diagnosis and Treatment of Postherpetic Neuralgia* (2016 Edition) | Disease duration of 1–6 months |
| 19 | Zhang | 2024 | Zheng Zhizhong, *Dermatology* (2009 Edition) | Not explicitly reported |
| 20 | Hu | 2025 | Not explicitly reported | Pain persists for more than 90 days after the herpes zoster lesions have healed |
| 21 | Zhao | 2021 | Not explicitly reported | Individuals who have been diagnosed with shingles and continue to experience pain after recovery; the specific duration is not specified. |

Supplementary Table 2: Diagnostic references and duration definitions of included studies
